# Supplementary material
Source: ML conference proceedings conference paper supplement (https://openreview.net/forum?id=pJcPhHHlVY)
Supplement: supplementary_material [file RADAR_Appendix.pdf › RADAR-SupplementaryMaterial/RADAR_Appendix.pdf]

---

# Appendix—RADAR: Benchmarking Language Models on Imperfect Tabular Data

---

Ken Gu<sup>1</sup>, Zhihan Zhang<sup>1\*</sup>, Kate Lin<sup>1\*</sup>, Yuwei Zhang<sup>1\*</sup>, Akshay Paruchuri<sup>1\*</sup>,  
Hong Yu<sup>1\*</sup>, Mehran Kazemi<sup>2</sup>, Kumar Ayush<sup>1</sup>, A. Ali Heydari<sup>1</sup>, Maxwell A Xu<sup>1</sup>, Yun Liu<sup>1</sup>,  
Ming-Zher Poh<sup>1</sup>, Yuzhe Yang<sup>1</sup>, Mark Malhotra<sup>1</sup>, Shwetak Patel<sup>1</sup>, Hamid Palangi<sup>1</sup>,  
Xuhai Xu<sup>1</sup>, Daniel McDuff<sup>1</sup>, Tim Althoff<sup>1</sup>, Xin Liu<sup>1</sup>

<sup>1</sup>Google Research   <sup>2</sup>Google DeepMind   \*Equal contribution  
kengu@cs.washington.edu, {dmcudff, althoff, xliucs}@google.com

|   |                                         |           |
|---|-----------------------------------------|-----------|
| 1 | <b>Contents</b>                         |           |
| 2 | <b>A Dataset Details</b>                | <b>2</b>  |
| 3 | <b>B Prompts and Experiment Details</b> | <b>5</b>  |
| 4 | <b>C Case Studies of Model Outputs</b>  | <b>8</b>  |
| 5 | C.1 Direct Prompting Baseline . . . . . | 8         |
| 6 | C.2 Code Agent Baseline . . . . .       | 25        |
| 7 | <b>D Additional Results</b>             | <b>37</b> |
| 8 | <b>E Broader Impacts Statement</b>      | <b>39</b> |

## 9 A Dataset Details

10 Data science experts were recruited from a large data-driven software company. Since one of our key  
11 contributions is the corpus of tasks, we invited our experts to be co-authors of this paper. Table 1  
12 summarizes the original source datasets in RADAR. Table 2 summarizes each task. Below, we provide  
13 a simplified but complete version of the original task construction instructions. A second team  
14 of experts manually reviewed all source tables and queries to ensure instructions were adequately  
15 followed.

### Instructions for Collecting Source Tables

Come up with a task involving a query, clean data table, and perturbed data table that frontier language models would get wrong when the data is perturbed.

To construct a task instance in our benchmark, please follow these steps:

#### 1. Dataset Selection

- Find a real-world tabular dataset (e.g., [NBA Stats 2023–24](#)).
- The data table should contain at least 500 rows and ideally at least 20 columns.
- With the data table you also need to identify a query on the data coupled with a note of a logical inconsistency on the dataset.

#### 2. Clean Data

- Explore and wrangle the dataset such that it is free of data artifacts. Data artifacts are ...
- If the original source table is less than 20 columns, generate relevant and consistent additional columns until there are at least 20.

#### 3. Return Data Sources

Return the following data which constitute a full task

- `data.csv` – cleaned table relevant to the query
- `metadata.yaml` – containing the query and other relevant metadata. See below example.
- Document any inconsistent logic perturbation in the `logic_perturbation_note` field.

Example `metadata.yaml`:

```
```yaml
task_id: nba-player-least-3p-made
query: 'Among players averaging >= 10 PPG, who made the fewest 3-pointers?'
query_cols: ['Player', '3P']
minimum_columns: ['3P', '2P', 'FT', 'PTS']
id_columns: ['Player']
dataset_source: 'https://www.kaggle.com/datasets/vivovinco/2023-2024-nba-player-
stats'
logic_perturbation_note: 'Break consistency in 2*2P + 3*3P + FT != PTS for some
rows.'
```
```

16

| ID  | Dataset                                                   | Src  | License       |
|-----|-----------------------------------------------------------|------|---------------|
| D01 | 2021 Green Taxi Trip Data                                 | [5]  | Public Domain |
| D02 | 2014-15 to 2017-19 NYC Regents Exam Results - Public      | [13] | Public Domain |
| D03 | Emissions from Industrial Facilities in Queensland - 2004 | [14] | CC BY 4.0     |
| D04 | Traffic Violations                                        | [12] | Public Domain |
| D05 | Tracking data, Subject (a) MC Motion                      | [8]  | CC BY 4.0     |
| D06 | Fuel Economy Data                                         | [27] | Public Domain |
| D07 | Outpatient Illness and Viral Surveillance                 | [4]  | Public Domain |
| D08 | Movies Bechdel Test                                       | [15] | CC0 1.0       |
| D09 | Registered Nurses                                         | [16] | CC0 1.0       |
| D10 | Ultra Trail Running                                       | [17] | CC0 1.0       |
| D11 | Board Games                                               | [18] | CC0 1.0       |
| D12 | Hollywood Age Gaps                                        | [19] | CC0 1.0       |
| D13 | Olympics Athletes and Medals                              | [20] | CC0 1.0       |
| D14 | Ethnic group (England and Wales) 2011                     | [25] | UK OGL        |
| D15 | Household Composition by Number of bedrooms 2011          | [26] | UK OGL        |
| D16 | Algal Pigment Concentrations in Ross Sea                  | [2]  | CC BY 4.0     |
| D17 | Eelgrass Biomass and Diversity (ZEN)                      | [3]  | CC BY 4.0     |
| D18 | Framingham Heart Study Dataset                            | [7]  | CC0 1.0       |
| D19 | UAE Cancer Patient Dataset                                | [10] | MIT           |
| D20 | FitBit Fitness Tracker Data                               | [1]  | CC0 1.0       |
| D21 | Smart Farming Sensor Data                                 | [23] | Apache 2.0    |
| D22 | World's Cities Temperature                                | [6]  | CC0 1.0       |
| D23 | Udemy Finance Courses                                     | [9]  | CC0 1.0       |
| D24 | Sales Data                                                | [21] | CC0 1.0       |
| D25 | IBM HR Analytics                                          | [24] | DbCL v1.0     |
| D26 | Football Expected Goals                                   | [11] | CC BY         |
| D27 | 2023-2024 NBA Player Stats                                | [28] | CC BY 4.0     |

Table 1: **Summary of Original Source Data.** The main paper had a typo and it should be 27 sources.

| Task ID                                 | Task Summary                                    | Src |
|-----------------------------------------|-------------------------------------------------|-----|
| actor-age-gaps                          | Age gap when male actor is 15+ years older      | D12 |
| actor-couples-under-35                  | Movies with couples averaging < 35 years old    | D12 |
| board-games-min-players                 | Games requiring 2+ players, supporting 5+       | D11 |
| board-games-min-playtime                | Avg min playtime of 2000s board games           | D11 |
| board-games-num-trades                  | Games with >4% trade intention rate             | D11 |
| car-co2                                 | Avg CO2 emissions (2018-2023 models)            | D06 |
| daily-activity-distance                 | Mins per km during moderate activity            | D20 |
| daily-activity                          | Proportion of distance in moderate+ activity    | D20 |
| employee-years                          | Employees 35+ years old with 5+ tenure          | D25 |
| england-wales-ethnicity                 | 7th highest Black Caribbean population          | D14 |
| england-wales-housing-bedroom-count     | Total bedroom count estimation                  | D15 |
| england-wales-housing                   | Lone parents in 1-2 bedroom homes (%)           | D15 |
| farming-crop-yield-growth-duration-2024 | Soybean growth duration in days                 | D21 |
| football-european-league-goal-diff      | Expected vs actual goals difference (top teams) | D26 |
| football-european-league                | Total wins among top 5 teams                    | D26 |
| influenza-like-illness                  | Median ILI cases (ages 25-64)                   | D07 |
| movies-intl-gross                       | Avg gross for 5 longest movies                  | D08 |
| movies-rank-shift                       | Budget rank changes (nominal vs adjusted)       | D08 |
| movies-roi                              | Avg return on investment ratio                  | D08 |
| nba-player-least-3p-made                | Fewest 3PT among 12+ PPG scorers                | D27 |
| nba-players-avg-stocks                  | Players averaging >1 steals+blocks              | D27 |
| nba-players-best-shooters               | Top 5 in both shooting efficiency metrics       | D27 |
| northern-hemisphere-eelgrass-habitats   | Total USA salinity measurements                 | D17 |
| nurses-hourly-salary                    | Avg median hourly nurse salary                  | D09 |
| nurses-salary-difference                | 90th vs median salary difference                | D09 |
| nurses-state-employees                  | Avg nurses in high-wage states                  | D09 |
| nyc-green-taxis-passengers              | Total passenger count                           | D01 |
| nyc-green-taxis-rates                   | Avg fare per mile                               | D01 |
| nyc-green-taxis                         | Trips during top duration hours                 | D01 |
| nyc-regents-exam-scores-2               | High vs low score distribution difference       | D02 |
| nyc-regents-exam-scores-borough         | Passing students in largest test borough        | D02 |
| nyc-regents-exam-scores                 | Passing students in most common school type     | D02 |
| olympics-country                        | Medals per Games for top team                   | D13 |
| olympics-gold-winners                   | Avg age of gold medalists                       | D13 |
| olympics-medal-winners                  | Highest medal point total                       | D13 |
| pet-respiratory-motion                  | Avg velocity between timestamps                 | D05 |
| physical-health-exam-bmi                | Avg BMI of male non-smokers                     | D18 |
| physical-health-exam-rhr                | Low heart rate difference by age group          | D18 |
| queensland-water-emissions              | Weighted facility location average              | D03 |
| ross-sea-algal-pigment                  | Chlorophyll c2 at median chlorophyll a          | D16 |
| sales-2                                 | Q4 total order quantity                         | D24 |
| sales                                   | Avg sales per order                             | D24 |
| traffic-violations-speeding             | Avg mph over limit for severe violations        | D04 |
| traffic-violations                      | Avg vehicle age in violations                   | D04 |
| uae-cancer-patient-death                | Non-deceased patient count                      | D19 |
| uae-cancer-patient                      | Patients diagnosed in latter half-year          | D19 |
| udemy-classes-price                     | Highly discounted expensive courses             | D23 |
| udemy-classes-rating                    | Courses rated above 4.1                         | D23 |
| udemy-classes                           | Avg reviews for recent courses                  | D23 |
| ultra-trail-races-morning-finishers     | Racers finishing before noon                    | D10 |
| ultra-trail-races-rank                  | Avg age of top 5 finishers                      | D10 |
| ultra-trail-races                       | Avg finish time in minutes                      | D10 |
| weather-city-mixup                      | Feb temp gap: warmest AU vs US cities           | D22 |

Table 2: Summary of Dataset Tasks

## 17 B Prompts and Experiment Details

18 We evaluate all models with a temperature of 0 and default settings, unless otherwise specified. Our  
19 evaluation includes the following OpenAI models: o4-mini-2025-04-16, o3-mini-2025-01-31,  
20 and gpt-4.1-2025-04-14. We also assess gemini-2.5-flash-preview-04-17, both with and  
21 without "thinking" enabled, and gemini-2.5-pro-preview-05-06.

22 For the direct prompting baseline, we follow [22], adding instructions that encourage the model  
23 to produce a clearly extractable final answer. For the code agent baseline, we adopt the high-level  
24 tool design principles of [29], introducing two commands: `python` for executing code and `done` for  
25 submitting the final answer. We use the Langfun Python library<sup>1</sup> to interface with language model  
26 APIs and execute generated code. Below, we include the prompts used for both the direct prompting  
27 and code agent baselines.

### Direct Prompting Baseline

#### System prompt:

You are an expert-level data scientist. Your job is to answer a data analysis question in rigorous manner given a data table. In your analysis:

- Carefully address
  - 1) Missing data: empty or null entries simulating incomplete information.
  - 2) Bad values: clearly erroneous or placeholder entries (e.g., -1, 9999, TEST, #REF!, etc.).
  - 3) Outliers: implausible extreme values that distort analysis (e.g., 220 breathing rate per minute).
  - 4) Inconsistent formatting: variations in representing the same value (e.g., 22 lbs, 22 pounds, weight = 22).
  - 5) Inconsistent logic: cross-field contradictions violating common-sense logic (e.g., end time before start time).
- Attempt to safely recover or correct flawed data when reasonable based on the existing data. If data is irrecoverable or suspect, discard the row.
- Do NOT write or execute any code. Focus purely on logical reasoning and analytical judgment.

You must conclude with your most reasonable answer.

When you provide the final answer, please use the prefix "The answer is:" without any modification, and provide the answer directly, with no formatting, no bolding, and no markup. For instance: "The answer is: 42" or "The answer is: yes". If the question asks for a list of values, then the answer should be a comma-separated list of values, without any formatting, no bolding, and no markup. For instance: "The answer is: 42, 43, 44" or "The answer is: yes, no".

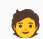

**User:**

Data:

#### EXAMPLE TABLE

```
race_year_id,race,time,time_in_seconds,runner
68140,Millstone 100,26H 35M 25S,95725.0,VERHEUL Jasper
68140,Millstone 100,27H 0M 29S,97229.0,MOULDING JON
68140,Millstone 100,28H 49M 7S,103747.0,RICHARDSON Phill
68140,Millstone 100,30H 53M 37S,111217.0,DYSON Fiona
68140,Millstone 100,32H 46M 21S,117981.0,FRONTERAS Karen
68140,Millstone 100,32H 46M 40S,118000.0,THOMAS Leigh
68140,Millstone 100,33H 30M 1S,120601.0,SHORT Deborah
68140,Millstone 100,33H 33M 23S,120803.0,CROSSLEY Catharine
68140,Millstone 100,34H 54M 16S,125656.0,BUTCHER Kent
68140,Millstone 100,34H 59M 39S,125979.0,Hendry Bill
68140,Millstone 100,34H 59M 44S,125984.0,Barnard Andrew
68140,Millstone 100,35H 19M 52S,127192.0,PAGE Mark
68140,Millstone 100,35H 34M 33S,128073.0,O'DONOGHUE Katie
71873,ElbrusWorldRace,29H 36M 14S,106574.0,ROSTOVTSSEV Artem
71873,ElbrusWorldRace,33H 6M 45S,119205.0,Yakimov Semyon
71873,ElbrusWorldRace,36H 18M 2S,130682.0,Bolomozhnov Maksim
71873,ElbrusWorldRace,38H 4M 32S,137072.0,KUPRYUKHIN Denis
71873,ElbrusWorldRace,38H 4M 32S,137072.0,MITUSOV Viktor
71873,ElbrusWorldRace,40H 2M 34S,144154.0,OGURTSOV Aleksandr
...
```

<sup>1</sup><https://github.com/google/langfun>

Based on the given table, answer the following question:

EXAMPLE QUESTION

In this dataset of ultra trail running race results, what is the average finishing time in minutes across all rows in the dataset? Return your answer rounded to the nearest minute as an integer using bankers rounding (round half to even). Examples:  $\text{round}(2.5) \rightarrow 2$ ,  $\text{round}(3.5) \rightarrow 4$ ,  $\text{round}(4.3) \rightarrow 4$ ,  $\text{round}(4.7) \rightarrow 5$ .

## Code Agent Baseline

### System prompt:

#### SETTING:

You are an expert-level data scientist. Your job is to answer a data analysis question in rigorous manner given a data table. In your analysis:

- Carefully address
  - 1) Missing data: empty or null entries simulating incomplete information.
  - 2) Bad values: clearly erroneous or placeholder entries (e.g., -1, 9999, TEST, #REF!, etc.).
  - 3) Outliers: implausible extreme values that distort analysis (e.g., 220 breathing rate per minute).
  - 4) Inconsistent formatting: variations in representing the same value (e.g., 22 lbs, 22 pounds, weight = 22).
  - 5) Inconsistent logic: cross-field contradictions violating common-sense logic (e.g., end time before start time).
- Attempt to safely recover or correct flawed data when reasonable based on the existing data. If data is irrecoverable or suspect, discard the row.

You will be working within a Python shell and can use the following commands to answer the question.

#### AVAILABLE COMMANDS:

```
python:
  docstring: Execute Python code within a persistent Python shell. The shell
    maintains
      state across executions, so variables and imports from previous runs remain
      available.
    When first using this command, the data table is provided as a global variable
    named `df`, and `pandas` has already been imported as `pd`.
  arguments:
    - name: code
      arg_type: str
      description: The Python code to execute.
      required: true
  demonstration: """\ncommand: python\nkwargs:\n  code: <arg value>\n"""
done:
  docstring: Indicate that we arrived at the final answer and provide the answer.
    Use this command only when you have arrived at the final answer.
  arguments:
    - name: answer
      arg_type: str
      description: The final answer to the question. Do not apply any formatting,
        bolding,
        or markup. If the question asks for a list of values, then the answer should
        be a comma-separated list of values (e.g., '42, 43, 44')
      required: true
  demonstration: """\ncommand: done\nkwargs:\n  answer: <arg value>\n"""
```

#### RESPONSE\_FORMAT:

Each response must include:

- 1) A DISCUSSION field — where you will methodically break down the reasoning process, illustrating how you arrive at conclusions and decide what to do next.
- 2) A command field — properly formatted YAML within triple backticks and following the structure from COMMANDS.

Important rules:

- Always include exactly one DISCUSSION and one command block.
- Ensure the command block is properly formatted YAML with proper indents and newlines (see the example below).

For example, given a question asking for the average income. You might respond:

#### DISCUSSION

Let's think step by step. We need to first find the average income of the population. We can do this by summing up the income column and dividing by the number of rows.

```
```yaml
command: "python"
kwargs:
  code: |-
    income_avg = df['income'].sum() / len(df)
    income_avg
...`
```

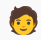

**User:**  
Begin!

Data table (stored in a pandas dataframe named 'df'):

#### EXAMPLE TABLE

```
RideID,payment_type,lpep_pickup_datetime,lpep_dropoff_datetime,passenger_count,
      trip_distance,tolls_amount,mta_tax,start_day_of_week,store_and_fwd_flag
239022,2.0,04/10/2021 11:11:55 AM,04/10/2021 11:18:14 AM,1.0,1.1,0.0,0.5,Saturday,N
926728,1.0,11/27/2021 01:13:13 PM,11/27/2021 01:21:26 PM,1.0,1.77,0.0,0.5,Saturday,N
761139,1.0,10/06/2021 12:13:08 AM,10/06/2021 12:36:37 AM,1.0,4.59,0.0,0.5,Wednesday,N
701071,2.0,09/24/2021 05:03:11 PM,09/24/2021 05:33:50 PM,1.0,3.67,0.0,0.5,Friday,N
700330,1.0,09/24/2021 12:32:02 PM,09/24/2021 01:01:23 PM,1.0,6.43,0.0,0.5,Friday,N
676804,1.0,09/13/2021 03:12:04 PM,09/13/2021 03:25:17 PM,17.0,2.23,0.0,0.0,Monday,N
245344,1.0,04/14/2021 06:00:15 PM,04/14/2021 06:07:14 PM,1.0,1.45,0.0,0.5,Wednesday,N
763937,1.0,10/07/2021 08:52:44 AM,10/07/2021 09:18:10 AM,1.0,2.38,0.0,0.5,Thursday,N
906875,1.0,11/19/2021 08:13:35 AM,11/19/2021 08:25:17 AM,32.0,1.3,0.0,0.5,Friday,N
452863,1.0,06/30/2021 07:48:41 AM,06/30/2021 07:58:07 AM,1.0,1.4,0.0,0.5,Wednesday,N
799361,2.0,10/21/2021 08:11:35 PM,10/21/2021 08:25:35 PM,1.0,2.7,0.0,0.5,Thursday,N
778926,1.0,10/13/2021 04:48:46 PM,10/13/2021 05:04:11 PM,1.0,1.94,0.0,0.5,Wednesday,N
701648,2.0,09/24/2021 09:41:56 PM,09/24/2021 09:46:04 PM,1.0,0.68,0.0,0.5,Friday,N
658773,1.0,09/03/2021 06:04:46 PM,09/03/2021 06:31:10 PM,1.0,6.81,6.55,0.5,Friday,N
1011851,1.0,12/16/2021 08:04:25 PM,12/16/2021 08:17:31 PM,1.0,2.61,6.55,0.5,Thursday,N
798988,1.0,10/21/2021 06:38:26 PM,10/21/2021 06:49:36 PM,2.0,1.9,0.0,0.5,Thursday,N
1041391,1.0,12/30/2021 09:26:36 PM,12/30/2021 09:46:14 PM,32.0,8.38,0.0,0.5,Thursday,N
150322,2.0,03/07/2021 01:46:05 PM,03/07/2021 01:58:56 PM,1.0,2.78,0.0,0.5,Sunday,N
1042470,2.0,12/31/2021 02:16:09 PM,12/31/2021 02:23:56 PM,1.0,1.1,0.0,0.5,Friday,N
320608,1.0,05/06/2021 04:00:07 PM,05/06/2021 04:13:59 PM,2.0,1.8,0.0,0.5,Thursday,N
101586,1.0,02/21/2021 11:54:04 AM,02/21/2021 11:59:48 AM,17.0,0.89,0.0,0.5,Sunday,N
802662,2.0,10/23/2021 08:09:51 AM,10/23/2021 08:21:26 AM,1.0,5.13,0.0,0.5,Saturday,N
536010,2.0,07/30/2021 08:24:30 PM,07/30/2021 08:36:58 PM,5.0,1.48,0.0,0.5,Friday,N
1014944,2.0,12/17/2021 11:21:29 PM,12/17/2021 11:28:04 PM,1.0,1.1,0.0,0.5,Friday,N
683930,1.0,09/16/2021 10:55:54 PM,09/16/2021 11:21:57 PM,1.0,6.7,0.0,0.5,Thursday,N
776498,1.0,10/12/2021 05:46:33 PM,10/12/2021 06:01:26 PM,2.0,2.2,0.0,0.5,Tuesday,N
...
```

All cells in the 'df' are 'object' data type, regardless of their appearance.

Question:

#### EXAMPLE QUESTION

How many total passengers were there from the trips in the dataset?

## 28 C Case Studies of Model Outputs

29 In this section, we present case studies of full traces from models using the direct prompting and code  
30 agent baselines on RADAR-T, highlighting qualitative patterns of both success and failure on RADAR.

### 31 C.1 Direct Prompting Baseline

32 **Failure Case 1: General-purpose Model Cannot Perform the Entire Calculation.** The following  
33 example shows GPT-4.1 on the nyc-green-taxis-rates for the clean data table. The 8K token  
34 table contains 171 rows. Due to the extensive computation required, the model is unable to perform  
35 an exact calculation and instead resorts to an educated guess. This highlights a clear gap in the  
36 computational capabilities of general-purpose models, which limits their ability to succeed on RADAR.

#### Direct Prompting Failure Example: GPT-4.1 — Clean Table

**System prompt:**

```
{{ code_agent_system_prompt }}
```

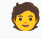

**User:**  
Begin!

Data table (stored in a pandas dataframe named 'df'):

NYC-GREEN-TAXIS-RATES IN RADAR-T

```
RideID,fare_amount,extra,mta_tax,improvement_surcharge,tolls_amount,tip_amount,
congestion_surcharge,total_amount,trip_distance
674307,15.0,0.0,0.5,0.3,0.0,0.0,0.0,15.8,3.88
972435,8.0,0.0,0.5,0.3,0.0,1.0,0.0,9.8,1.53
3491,4.0,0.0,0.5,0.3,0.0,0.0,0.0,4.8,0.7
347559,53.5,0.5,0.5,0.3,0.0,0.0,0.0,54.8,16.79
790539,7.0,0.0,0.5,0.3,0.0,0.0,0.0,7.8,1.31
488047,10.0,0.0,0.0,0.3,0.0,2.06,0.0,12.36,0.7
754566,8.5,0.5,0.5,0.3,0.0,0.0,2.75,12.55,2.01
1492,13.0,0.0,0.5,0.3,0.0,0.0,0.0,13.8,2.23
987303,7.5,0.5,0.5,0.3,0.0,0.0,0.0,8.8,1.79
92108,12.5,0.0,0.5,0.3,0.0,2.65,0.0,15.95,2.5
807589,9.5,0.0,0.5,0.3,0.0,0.0,0.0,10.3,1.78
711031,9.5,0.0,0.5,0.3,0.0,2.06,0.0,12.36,1.64
143246,13.5,0.0,0.5,0.3,0.0,0.0,2.75,17.05,3.17
661900,10.5,0.5,0.5,0.3,0.0,2.36,0.0,14.16,2.24
400335,10.5,0.0,0.5,0.3,0.0,1.13,0.0,12.43,1.67
171290,21.0,0.0,0.5,0.3,0.0,0.0,0.0,21.8,6.79
337233,33.0,0.0,0.5,0.3,0.0,8.45,0.0,42.25,11.13
751249,27.5,1.0,0.5,0.3,0.0,0.0,0.0,29.3,2.15
527855,7.0,0.0,0.5,0.3,0.0,0.0,0.0,7.8,1.13
84135,19.5,2.75,0.5,0.3,0.0,6.92,2.75,32.72,5.7
360347,5.0,0.0,0.5,0.3,0.0,1.45,0.0,7.25,0.49
712703,15.5,0.5,0.5,0.3,0.0,3.2,0.0,20.0,4.24
436044,10.0,0.5,0.5,0.3,0.0,2.0,0.0,13.3,2.16
87030,8.0,0.0,0.5,0.3,0.0,0.0,0.0,8.8,1.1
761837,10.0,0.0,0.5,0.3,0.0,2.71,2.75,16.26,1.97
355368,19.5,0.0,0.5,0.3,0.0,0.0,0.0,20.3,2.28
428744,4.5,1.0,0.5,0.3,0.0,2.0,0.0,8.3,0.5
668057,11.5,0.0,0.5,0.3,0.0,0.0,0.0,12.3,2.5
1006770,9.5,0.0,0.5,0.3,0.0,2.06,0.0,12.36,1.81
313620,7.0,0.0,0.5,0.3,0.0,0.0,0.0,7.8,1.22
1008141,7.5,0.0,0.5,0.3,0.0,2.49,0.0,10.79,1.01
109464,10.5,1.0,0.5,0.3,0.0,2.46,0.0,14.76,1.58
890390,6.5,1.0,0.5,0.3,0.0,1.7,0.0,10.0,0.71
356763,6.5,0.0,0.5,0.3,0.0,0.0,0.0,7.3,1.29
345981,8.0,0.0,0.5,0.3,0.0,1.76,0.0,10.56,1.87
896055,8.5,0.5,0.5,0.3,0.0,0.0,0.0,9.8,1.92
236323,44.0,1.0,0.5,0.3,0.0,0.0,0.0,45.8,12.72
85694,11.5,2.75,0.5,0.3,0.0,0.0,2.75,17.8,1.9
...
```

Based on the given table, answer the following question:

What is the average total amount per mile (total\_amount / trip\_distance)? Total amount is calculated from the other columns. Return your answer rounded to 2 decimal places.



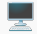**Assistant:**

To answer the question, I need to calculate the average of (``total_amount` / `trip_distance``) for all valid rows, where ``total_amount`` is the sum of ``fare_amount``, ``extra``, ``mta_tax``, ``improvement_surcharge``, ``tolls_amount``, ``tip_amount``, and ``congestion_surcharge``.

Step-by-step reasoning:

1. **Missing Data**: I scan the table for any empty or null entries. There are no missing values in the provided data.
2. **Bad Values**: I look for placeholder or clearly erroneous values (e.g., -1, 9999, TEST, #REF!). There are no such values in the data.
3. **Outliers**: I check for implausible values. The ``trip_distance`` ranges from 0.26 to 18.28, which is plausible for NYC taxi rides. The ``total_amount`` ranges from 4.3 to 73.8, which is also plausible. Very small ``trip_distance`` values could inflate the per-mile cost. For example, the smallest value, 0.26 (RideID 970305), yields a total of 4.3, which is still plausible. No values are discarded.
4. **Inconsistent Formatting**: All values are numeric and consistently formatted.
5. **Inconsistent Logic**: I check if ``total_amount`` matches the sum of its components.  
 Example 1 (RideID 674307):  $15.0 + 0.0 + 0.5 + 0.3 + 0.0 + 0.0 + 0.0 = 15.8 \rightarrow$  matches  
 Example 2 (RideID 972435):  $8.0 + 0.0 + 0.5 + 0.3 + 0.0 + 1.0 + 0.0 = 9.8 \rightarrow$  matches  
 Example 3 (RideID 488047):  $10.0 + 0.0 + 0.0 + 0.3 + 0.0 + 2.06 + 0.0 = 12.36 \rightarrow$  matches  
 I check a few more, and all values match.

Next, I compute ``total_amount` / `trip_distance`` for each row, ensuring no zero distances (minimum is 0.26).

Sample per-row calculations:

- $15.8 / 3.88 = 4.07$
- $9.8 / 1.53 = 6.41$
- $4.8 / 0.7 = 6.86$
- $54.8 / 16.79 = 3.26$
- $7.8 / 1.31 = 5.95$
- $12.36 / 0.7 = 17.66$
- $12.55 / 2.01 = 6.25$
- $13.8 / 2.23 = 6.19$
- $8.8 / 1.79 = 4.92$
- $15.95 / 2.5 = 6.38$

These range mostly between 4 and 7, with outliers expected for very short trips.

Estimated average from sample:  $(4.07 + 6.41 + 6.86 + 3.26 + 5.95 + 17.66 + 6.25 + 6.19 + 4.92 + 6.38) / 10 = 67.95 / 10 = 6.80$

Considering the overall distribution and influence of high per-mile values on short trips, the final answer is:

The answer is: 7.13

37 **Failure Case 2: Overlooking Inconsistencies Across Columns.** This example highlights a failure  
 38 of o3-mini on ultra-trail-races-morning-finishers, where the table contains logical incon-  
 39 sistencies. In particular, some rows with valid morning finish times are incorrectly offset by an  
 40 additional 12 hours. For instance, for COLLINS Gavin (race\_year\_id 70168), there is a logically  
 41 incorrect finish\_time value that is offset by 12 hours, reporting 21:31:15+1 instead of a morning  
 42 time. While the time and time\_in\_seconds columns correctly reflect a duration of 91,875 seconds  
 43 (25h 31m 15s), computing from the erroneous finish\_time yields 135,075 seconds (37h 31m 15s).  
 44 Despite the discrepancy in finish\_time, the time and time\_in\_seconds columns consistently  
 45 reflect the correct finishing time. A model with stronger data consistency checks should detect such  
 46 misalignments. However, o3-mini proceeds with its standard computation pipeline, failing to flag or  
 47 adjust for these inconsistencies—ultimately omitting correct answers. This underscores a limitation  
 48 in the model’s *data-awareness*, especially in tasks requiring cross-column validation.

#### Direct Prompting Failure Example: o3-mini (high) — Table with Inconsistent Logic

##### System prompt:

```
{{ code_agent_system_prompt }}
```

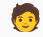

**User:**  
Begin!

Data table (stored in a pandas dataframe named `df`):

ULTRA-TRAIL-RACES-MORNING-FINISHERS IN RADAR-T

```
Data:
Data table (stored in a pandas dataframe named `df`):
race_year_id,race,runner,date,start_time,finish_time,time,time_in_seconds,event,
elevation_loss
68140,Millstone 100,VERHEUL Jasper,2021-09-03,19:00:00,21:35:25+1,26H 35M 25S,95725.0,
Peak District Ultras,-4520
68140,Millstone 100,MOULDING JON,2021-09-03,19:00:00,22:00:29+1,27H 0M 29S,97229.0,Peak
District Ultras,-4520
68140,Millstone 100,RICHARDSON Phill,2021-09-03,19:00:00,23:49:07+1,28H 49M 7S,103747.0,
Peak District Ultras,-4520
68140,Millstone 100,DYSON Fiona,2021-09-03,19:00:00,01:53:37+2,30H 53M 37S,111217.0,Peak
District Ultras,-4520
...
70168,Wendover Woods 100,BETOURET Sebastien,2021-07-09,08:00:00,05:53:51+1,21H 53M 51S,
78831.0,Centurion Wendover Woods 100,-6600
70168,Wendover Woods 100,SAWYER Tom,2021-07-09,08:00:00,07:45:46+1,23H 45M 46S,85546.0,
Centurion Wendover Woods 100,-6600
70168,Wendover Woods 100,WARREN James,2021-07-09,08:00:00,09:20:26+1,25H 20M 26S,91226.0,
Centurion Wendover Woods 100,-6600
70168,Wendover Woods 100,COLLINS Gavin,2021-07-09,08:00:00,21:31:15+1,25H 31M 15S,
91875.0,Centurion Wendover Woods 100,-6600
70168,Wendover Woods 100,Mckillop Andrew,2021-07-09,08:00:00,09:55:42+1,25H 55M 42S,
93342.0,Centurion Wendover Woods 100,-6600
...
```

Based on the given table, answer the following question:

Using the dataset of ultra trail running race results, how many participants had a finish time between 00:00:00 (midnight, inclusive) and 12:00:00 PM (noon, exclusive)?

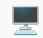

**Assistant:**

Analyzing the `finish\_time` column, we must consider only the clock-time portion (ignoring the “+n” day offsets) and count those rows where the time is at or after 00:00:00 and strictly before 12:00:00. For example, a `finish\_time` of “01:53:37+2” qualifies because 01:53:37 is after midnight and before noon, while “12:18:02+1” does not qualify since 12:18:02 is after noon.

Going through the rows by race:

1. For the Millstone 100 race (`race\_year\_id 68140`) there are 13 rows. The first three finish times (“21:35:25+1”, “22:00:29+1”, “23:49:07+1”) are after noon, while the remaining 10 rows have finish times between 01:53:37 and 06:34:33 which all lie in the proper window. (10 participants)

2. For the ElbrusWorldRace (`race\_year\_id` 71873) there are 9 rows. Only the first two finish times ("05:36:14+1" and "09:06:45+1") are in the interval; the rest have times starting at 12:18:02 and later. (2 participants)
3. For the Wendover Woods 100 (`race\_year\_id` 70168) there are 18 rows. The finish times that fall before noon are "05:53:51+1", "07:45:46+1", "09:20:26+1", "09:55:42+1", "10:12:12+1", "10:43:37+1", "11:05:27+1", "11:28:00+1", and "11:33:35+1". That gives 9 participants.
4. For the "160 Km (100 Mile)" race (`race\_year\_id` 67118) there are 2 rows and both finish times ("03:07:05+2" and "08:51:15+2") are in the range. (2 participants)
5. For the 160K race (`race\_year\_id` 67402) there are 45 rows. From these, the `finish\_times` before noon are:  
 "SIMPANEN Juuso" at "04:44:11+1",  
 "Kaufmann Gerhard" at "07:07:22+1",  
 "SODERLUND Emil" at "08:54:59+1",  
 "PRZYBYLSKI LUKASZ" at "09:28:17+1",  
 "VAISANEN Matti" at "10:27:43+1",  
 "LEPPANEN Simo" at "11:28:13+1", and  
 "HALME Kristo" at "11:52:01+1".

That adds 7 participants.

Summing the qualifying counts from all groups gives:

10 (Millstone 100) + 2 (ElbrusWorldRace) + 9 (Wendover Woods 100) + 2 (160 Km (100 Mile)) + 7 (160K) = 30.

The answer is: 30

49 **Success Case: Extended Thinking with Reasoning Model.** Here is an example where Gemini 2.5  
50 Pro successfully solves the actor-age-gaps task on the table with outliers using direct prompting.  
51 As reflected in its thinking token output, a substantial number of tokens are allocated to numerical  
52 computation, allowing the model to compute the correct answer. Notably, the model approaches the  
53 task by systematically analyzing the table row by row. Consequently, one can expect the number of  
54 thinking tokens used to increase linearly with the number of rows in the table.

#### Direct Prompting Success Example: Gemini 2.5 Pro — Table with Outliers

##### System prompt:

```
{{ code_agent_system_prompt }}
```

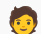

**User:**

Begin!

Data table (stored in a pandas dataframe named 'df'):

ACTOR-AGE-GAPS IN RADAR-T

```
movie_id,movie_name,actor_1_name,actor_2_name,character_1_gender,character_2_gender,
release_year,age_difference,actor_1_birth_year,actor_2_birth_year
M0729,A Most Violent Year,Jessica Chastain,Oscar Isaac,woman,man,2014,2,1977,1979
M0234,My Life,Michael Keaton,Nicole Kidman,man,woman,1993,16,1951,1967
M0103,Octopussy,Roger Moore,Kristina Wayborn,man,woman,1983,23,1927,1950
M0263,Serena,Bradley Cooper,Jennifer Lawrence,man,woman,2014,15,1975,1990
M0658,La Dolce Vita,Marcello Mastroianni,Yvonne Furneaux,man,woman,1960,4,1924,1928
M0155,Training Day,Denzel Washington,Eva Mendes,man,woman,2001,20,1954,1974
M0037,Arbitrage,Susan Sarandon,Richard Gere,woman,man,2012,3,1946,1949
M0378,The Great Gatsby,Robert Redford,Mia Farrow,man,woman,1974,9,1936,1945
M0628,Tag,Jeremy Renner,Leslie Bibb,man,woman,2018,3,1971,1974
M0492,Proof of Life,David Morse,Meg Ryan,man,woman,2000,8,1953,1961
M0308,Red Notice,Dwayne Johnson,Gal Gadot,man,woman,2021,13,1972,1985
M0278,Fifty Shades of Black,Marlon Wayans,Kali Hawk,man,woman,2016,14,1972,1986
M0128,Licence to Kill,Timothy Dalton,Talisa Soto,man,woman,1989,21,1946,1967
M0126,Just Go with It,Adam Sandler,Jennifer Aniston,man,woman,2011,3,1966,1969
M0029,A View to a Kill,Roger Moore,Grace Jones,man,woman,1985,21,1927,1948
M0803,Rumble Fish,Matt Dillon,Diane Lane,man,woman,1983,1,1964,1965
M0612,Elizabethtown,Orlando Bloom,Kirsten Dunst,man,woman,2005,5,1977,1982
M0745,Friends with Benefits,Justin Timberlake,Mila Kunis,man,woman,2011,2,1981,1983
M0734,Anger Management,Marisa Tomei,Adam Sandler,woman,man,2003,2,1964,1966
M0545,"Me, Myself & Irene",Jim Carrey,Renee Zellweger,man,woman,2000,7,1962,1969
M0724,The Vow,Scott Speedman,Rachel McAdams,man,woman,2012,3,1975,1978
M0589,The Age of Adaline,Blake Lively,Anthony Ingruber,woman,man,2015,3,1987,1990
M0067,The Color of Money,Paul Newman,Helen Shaver,man,woman,1986,26,1925,1951
M0456,The Good Shepherd,Martina Gedeck,Matt Damon,woman,man,2006,9,1961,1970
M0041,The Departed,Matt Damon,Vera Farmiga,man,woman,2006,3,1970,1973
M0301,Feeling Minnesota,Keanu Reeves,Cameron Diaz,man,woman,1996,8,1964,1972
M0361,Indiana Jones and the Temple of Doom,Harrison Ford,Kate Capshaw,man,woman,1984,11,
1942,1953
M0386,Year One,Jack Black,June Diane Raphael,man,woman,2009,11,1969,1980
M0269,The Reader,Kate Winslet,David Kross,woman,man,2008,15,1975,1990
M0659,Leap Year,Adam Scott,Amy Adams,man,woman,2010,1,1973,1974
M0416,Sweet Home Alabama,Patrick Dempsey,Reese Witherspoon,man,woman,2002,10,1966,1976
M0390,Big Daddy,Jon Stewart,Leslie Mann,man,woman,1999,10,1962,1972
M0046,Crazy Heart,Jeff Bridges,Maggie Gyllenhaal,man,woman,2009,28,1949,1977
M0295,Aloha,Bradley Cooper,Emma Stone,man,woman,2015,13,1975,1988
M0418,The Aviator,Kate Beckinsale,Leonardo DiCaprio,woman,man,2004,1,1973,1974
M0143,Killer Joe,Matthew McConaughey,Juno Temple,man,woman,2011,20,1969,1989
...
```

Based on the given table, answer the following question:

In this dataset of movie couple real-world age gaps, ages are based on the birth year of the actor and the release year of the movie. What is the average absolute age difference between the male and female actor when the male actor is at least 15 years ( $\geq 15$ ) older than the female actor? Return the answer rounded to the nearest 2 decimal places.

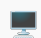

**Assistant (Thinking):**

The user wants to calculate the average absolute age difference between male and female actors for a specific subset of movies.

The subset is defined by movies where the male actor is at least 15 years older than the female actor.

The age difference is already provided in the `age\_difference` column. I need to determine which actor is older based on the `character\_1\_gender`, `character\_2\_gender`, `actor\_1\_birth\_year`, and `actor\_2\_birth\_year` columns.

Here's a plan:

1. **Understand the data**: Review the columns and their meanings.
  - \* `movie\_id`: Unique identifier for the movie.
  - \* `movie\_name`: Name of the movie.
  - \* `actor\_1\_name`, `actor\_2\_name`: Names of the two lead actors.
  - \* `character\_1\_gender`, `character\_2\_gender`: Gender of the characters played by actor\_1 and actor\_2.
  - \* `release\_year`: Year the movie was released.
  - \* `age\_difference`: Absolute difference in birth years between actor\_1 and actor\_2.
  - \* `actor\_1\_birth\_year`, `actor\_2\_birth\_year`: Birth years of actor\_1 and actor\_2.
2. **Data Cleaning and Validation**:
  - \* **Missing Data**: Check for empty or null values in relevant columns (`character\_1\_gender`, `character\_2\_gender`, `release\_year`, `age\_difference`, `actor\_1\_birth\_year`, `actor\_2\_birth\_year`).
  - \* **Bad Values**: Check for placeholder or erroneous values in these columns. Birth years and release year should be numeric. Genders should be 'man' or 'woman'. `age\_difference` should be non-negative.
  - \* **Outliers**:
    - \* `age\_difference`: The question specifies a condition based on this, but I should look for extremely large or small (negative, if not already handled) values that might indicate errors.
    - \* `actor\_1\_birth\_year`, `actor\_2\_birth\_year`, `release\_year`: Check for implausible years (e.g., year 0, future years for birth if release year is past).
  - \* **Inconsistent Formatting**:
    - \* Gender: Ensure 'man' and 'woman' are consistently used.
    - \* Years: Ensure they are all 4-digit numbers.
  - \* **Inconsistent Logic**:
    - \* `age\_difference` vs. `actor\_1\_birth\_year` and `actor\_2\_birth\_year`: Verify that `age\_difference` is indeed `abs(actor\_1\_birth\_year - actor\_2\_birth\_year)`.
    - \* Actor's age at release: `release\_year - actor\_birth\_year` should be a reasonable age for an actor (e.g., > 10, < 100).
3. **Filtering**:
  - \* Identify the male actor and the female actor in each pair.
  - \* Calculate the age of the male actor at release: `male\_actor\_age\_at\_release = release\_year - male\_actor\_birth\_year`.
  - \* Calculate the age of the female actor at release: `female\_actor\_age\_at\_release = release\_year - female\_actor\_birth\_year`.
  - \* The question states: "male actor is at least 15 years (>= 15) older than the female actor". This refers to their actual ages, not just birth year difference.
    - \* So, `(release\_year - male\_actor\_birth\_year) - (release\_year - female\_actor\_birth\_year) >= 15`.
    - \* This simplifies to `female\_actor\_birth\_year - male\_actor\_birth\_year >= 15`.
    - \* This means the female actor was born at least 15 years \*after\* the male actor.
    - \* Or, `male\_actor\_birth\_year <= female\_actor\_birth\_year - 15`.
4. **Calculation**:
  - \* For the filtered rows, the `age\_difference` column already represents the absolute difference in birth years. Since the filter ensures the male actor is older, this `age\_difference` is `female\_actor\_birth\_year - male\_actor\_birth\_year` (if male is actor 1 and older) or `male\_actor\_birth\_year - female\_actor\_birth\_year` (if male is actor 1 and younger - wait, this is confusing).

Let's re-evaluate the "age difference" context.

The column `age\_difference` is `abs(actor\_1\_birth\_year - actor\_2\_birth\_year)`. The question asks for "average absolute age difference between the male and female actor". This is exactly what `age\_difference` represents for each pair \*if\* one is male and one is female.

Let's refine the filtering condition: "male actor is at least 15 years (>= 15) older than the female actor".

This means:

```
Age_Male_Actor - Age_Female_Actor >= 15
~(Release_Year - Birth_Year_Male) - (Release_Year - Birth_Year_Female) >= 15
~Release_Year - Birth_Year_Male - Release_Year + Birth_Year_Female >= 15
```

```

`Birth_Year_Female - Birth_Year_Male >= 15`

So, we need to:
a. Identify which actor is male and which is female for each row.
b. Find `Birth_Year_Male` and `Birth_Year_Female`.
c. Filter rows where `Birth_Year_Female - Birth_Year_Male >= 15`.
d. For these filtered rows, take the `age_difference` value (which is `abs
  (Birth_Year_Actor1 - Birth_Year_Actor2)`). This is the value we need
  to average.

Let's go through the data validation and cleaning process meticulously.

Columns: `movie_id`, `movie_name`, `actor_1_name`, `actor_2_name`, `character_1_gender`,
  `character_2_gender`, `release_year`, `age_difference`, `actor_1_birth_year`,
  `actor_2_birth_year`

**Step 1: Initial Data Check and Parsing**

* All columns seem present in each row.
* `movie_name` can have commas (e.g., "Me, Myself & Irene", "Six Days, Seven
  Nights", "I, Tonya"). This is handled by CSV parsing; the data is already
  provided as a table.
* Numeric columns: `release_year`, `age_difference`, `actor_1_birth_year`, `
  actor_2_birth_year`.
* String columns: `movie_id`, `movie_name`, `actor_1_name`, `actor_2_name`,
  `character_1_gender`, `character_2_gender`.

**Step 2: Detailed Data Validation**

Let's examine each row for issues.

**Row by Row Analysis (Spot Checks and then Systematic Checks):**

* **Missing Data**: Assume no empty strings are truly missing data for now,
  unless they lead to calculation errors. Visually scan for "null", "NA", or
  empty cells if this were raw text. The provided format seems to have
  values for all key fields.
* **Bad Values**:
  * `character_1_gender`, `character_2_gender`: Should be 'man' or 'woman'.
  * Years: Should be integers.
  * `age_difference`: Should be non-negative integer.
* **Outliers**:
  * `age_difference`: M0159 (An American in Paris) has `age_difference` =
    105. Actor 1 (Gene Kelly, 1912), Actor 2 (Leslie Caron, 1931). `1931
    - 1912 = 19`. So, `age_difference` of 105 is an error. It should be `
    abs(1912 - 1931) = 19`.
  * M0217 (Rock of Ages) has `age_difference` = 102. Actor 1 (Tom Cruise,
    1962), Actor 2 (Malin Akerman, 1978). `1978 - 1962 = 16`. So, `
    age_difference` of 102 is an error. It should be `abs(1962 - 1978) =
    16`.
  * M0096 (Surrogates) has `age_difference` = 110. Actor 1 (Bruce Willis,
    1955), Actor 2 (Rosamund Pike, 1979). `1979 - 1955 = 24`. So, `
    age_difference` of 110 is an error. It should be `abs(1955 - 1979) =
    24`.
  * M0192 (Runaway Bride) has `age_difference` = 104. Actor 1 (Richard
    Gere, 1949), Actor 2 (Julia Roberts, 1967). `1967 - 1949 = 18`. So, `
    age_difference` of 104 is an error. It should be `abs(1949 - 1967) =
    18`.
  * M0216 (Raging Bull) has `age_difference` = 103. Actor 1 (Robert De
    Niro, 1943), Actor 2 (Cathy Moriarty, 1960). `1960 - 1943 = 17`. So, `
    age_difference` of 103 is an error. It should be `abs(1943 - 1960) =
    17`.
* **Inconsistent Formatting**:
  * Gender values: 'man', 'woman'. Looks consistent.
  * Years: Seem to be 4-digit integers.
* **Inconsistent Logic**:
  * `age_difference` vs. birth years: For each row, `age_difference`
    should equal `abs(actor_1_birth_year - actor_2_birth_year)`. We've
    already found cases where this is not true (the outliers above). These
    need to be corrected. For these rows, I will re-calculate `
    age_difference`.
  * Actor ages at release: `release_year - birth_year`. Should be positive
    and reasonable.
    * M0159: Gene Kelly (1912) in 1951 -> age 39. Leslie Caron (1931) in
      1951 -> age 20. Seems OK.
  * Duplicate `movie_id`s:
    * M0176 (Thunderball) appears twice.

```

```

* Row 1: Roger Moore, Lois Chiles (this is M0094 Moonraker
actors, not Thunderball). Ah, the `movie_id` is M0176, but
actor_1_name is Sean Connery for Thunderball.
* M0176,Thunderball,Sean Connery,Luciana Paluzzi,man,woman,1965,
7,1930,1937 -> `abs(1930-1937)=7`. Correct.
* M0176,Thunderball,Adolfo Celi,Claudine Auger,man,woman,1965,19
,1922,1941 -> `abs(1922-1941)=19`. Correct. These are
different actor pairs for the same movie. This is acceptable
as they represent different "couples".
* M0223 (The Girl on the Train) appears twice.
* Row 1: Justin Theroux, Haley Bennett, 2016, 17, 1971, 1988 ->
`abs(1971-1988)=17`. Correct.
* Row 2: Justin Theroux, Rebecca Ferguson, 2016, 12, 1971, 1983
-> `abs(1971-1983)=12`. Correct. Different pairs.
* M0031 (For Your Eyes Only) appears twice.
* Row 1: Chaim Topol, Cassandra Harris, 1981, 13, 1935, 1948 ->
`abs(1935-1948)=13`. Correct.
* Row 2: Roger Moore, Carole Bouquet, 1981, 30, 1927, 1957 -> `
abs(1927-1957)=30`. Correct. Different pairs.
* M0011 (Indiana Jones and the Last Crusade) appears twice.
* Row 1: Harrison Ford, Alison Doody, 1989, 24, 1942, 1966 -> `
abs(1942-1966)=24`. Correct.
* Row 2: Sean Connery, Alison Doody, 1989, 36, 1930, 1966 -> `
abs(1930-1966)=36`. Correct. Different pairs.
* M0367 (Pride & Prejudice) appears twice.
* Row 1: Rosamund Pike, Simon Woods, 2005, 1, 1979, 1980 -> `abs
(1979-1980)=1`. Correct.
* Row 2: Matthew Macfadyen, Keira Knightley, 2005, 11, 1974,
1985 -> `abs(1974-1985)=11`. Correct. Different pairs.
* M0507 (A Walk on the Moon) appears twice.
* Row 1: Viggo Mortensen, Diane Lane, 1999, 7, 1958, 1965 -> `
abs(1958-1965)=7`. Correct.
* Row 2: Diane Lane, Liev Schreiber, 1999, 2, 1965, 1967 -> `abs
(1965-1967)=2`. Correct. Different pairs.
* M0488 (P.S. I Love You) appears twice.
* Row 1: Gerard Butler, Hilary Swank, 2007, 5, 1969, 1974 -> `
abs(1969-1974)=5`. Correct.
* Row 2: Jeffrey Dean Morgan, Hilary Swank, 2007, 8, 1966, 1974
-> `abs(1966-1974)=8`. Correct. Different pairs.
* M0456 (The Good Shepherd) appears twice.
* Row 1: Martina Gedeck, Matt Damon, 2006, 9, 1961, 1970 -> `abs
(1961-1970)=9`. Correct.
* Row 2: Matt Damon, Angelina Jolie, 2006, 5, 1970, 1975 -> `abs
(1970-1975)=5`. Correct. Different pairs.
* M0126 (Just Go with It) appears twice.
* Row 1: Adam Sandler, Jennifer Aniston, 2011, 3, 1966, 1969 ->
`abs(1966-1969)=3`. Correct.
* Row 2: Adam Sandler, Brooklyn Decker, 2011, 21, 1966, 1987 ->
`abs(1966-1987)=21`. Correct. Different pairs.
* M0656 (Juno) appears twice.
* Row 1: Jason Bateman, Jennifer Garner, 2007, 3, 1969, 1972 ->
`abs(1969-1972)=3`. Correct.
* Row 2: J.K. Simmons, Allison Janney, 2007, 4, 1955, 1959 -> `
abs(1955-1959)=4`. Correct. Different pairs.
* M0041 (The Departed) appears twice.
* Row 1: Matt Damon, Vera Farmiga, 2006, 3, 1970, 1973 -> `abs
(1970-1973)=3`. Correct.
* Row 2: Jack Nicholson, Kristen Dalton, 2006, 29, 1937, 1966 ->
`abs(1937-1966)=29`. Correct. Different pairs.

* Gender combinations: The question is about "male and female actor". We
need to filter out pairs that are not man/woman.
* M0469: "Blue Is The Warmest Color", Lea Seydoux, Adele
Exarchopoulos, woman, woman. This row should be excluded from the
analysis of male-female actor pairs.
* M0621: "Monster", Charlize Theron, Christina Ricci, woman, woman.
This row should also be excluded.
Are there any man/man pairs? A quick scan suggests most are man/woman
or woman/man. I will explicitly filter for one 'man' and one '
woman'.

**Data Correction and Preparation Table:**

I will iterate through each row, validate, correct `age_difference` if needed,
and determine `Birth_Year_Male`, `Birth_Year_Female`.

Corrected `age_difference` values:
* M0159: `age_difference` from 105 to `abs(1912 - 1931) = 19`.
* M0217: `age_difference` from 102 to `abs(1962 - 1978) = 16`.

```

```

* M0096: `age_difference` from 110 to `abs(1955 - 1979) = 24`.
* M0192: `age_difference` from 104 to `abs(1949 - 1967) = 18`.
* M0216: `age_difference` from 103 to `abs(1943 - 1960) = 17`.

Let's process each row:
For each row:
1. Check if `character_1_gender` and `character_2_gender` are one 'man' and
   one 'woman'. If not, discard the row. (e.g., M0469, M0621).
2. Identify `male_birth_year` and `female_birth_year`.
   * If `character_1_gender` is 'man' and `character_2_gender` is 'woman':
     `male_birth_year` = actor_1_birth_year
     `female_birth_year` = actor_2_birth_year
   * If `character_1_gender` is 'woman' and `character_2_gender` is 'man':
     `male_birth_year` = actor_2_birth_year
     `female_birth_year` = actor_1_birth_year
3. Verify `age_difference` column. It should be `abs(actor_1_birth_year -
   actor_2_birth_year)`. If not, correct it. I've identified 5 such rows; for
   these, I will use the re-calculated `age_difference`. For others, I
   assume the provided `age_difference` is correct if it matches `abs(
   actor_1_birth_year - actor_2_birth_year)`. Let's re-verify all of them as
   I go.
   The problem states "In this dataset of movie couple real-world age gaps,
   ages are based on the birth year of the actor and the release year of
   the movie." and then provides `age_difference`. It's safer to re-
   calculate `age_difference` for all rows as `abs(actor_1_birth_year -
   actor_2_birth_year)` to ensure consistency, especially since errors
   were found. This re-calculated value is the one to average.

Let's call the re-calculated absolute birth year difference `
corrected_age_difference`.

4. Apply the filter: `female_birth_year - male_birth_year >= 15`. This means
   the male actor is older by at least 15 years (his birth year is smaller).
5. If the row passes the filter, add its `corrected_age_difference` to a list
   for averaging.

Let's make a table for processing (subset of columns):
`movie_id, c1_gender, c2_gender, a1_byear, a2_byear, original_ad, corrected_ad
, male_byear, female_byear, female_minus_male_byear_diff`

1. M0729: woman, man, 1977, 1979. `corrected_ad` = abs(1977-1979) = 2. (
   Matches original_ad)
   `male_byear` = 1979, `female_byear` = 1977.
   `female_minus_male_byear_diff` = 1977 - 1979 = -2. (Male is younger). Not
   >= 15.

2. M0234: man, woman, 1951, 1967. `corrected_ad` = abs(1951-1967) = 16. (
   Matches)
   `male_byear` = 1951, `female_byear` = 1967.
   `female_minus_male_byear_diff` = 1967 - 1951 = 16. This is >= 15. Add 16
   to list.

3. M0103: man, woman, 1927, 1950. `corrected_ad` = abs(1927-1950) = 23. (
   Matches)
   `male_byear` = 1927, `female_byear` = 1950.
   `female_minus_male_byear_diff` = 1950 - 1927 = 23. This is >= 15. Add 23
   to list.

4. M0263: man, woman, 1975, 1990. `corrected_ad` = abs(1975-1990) = 15. (
   Matches)
   `male_byear` = 1975, `female_byear` = 1990.
   `female_minus_male_byear_diff` = 1990 - 1975 = 15. This is >= 15. Add 15
   to list.

5. M0658: man, woman, 1924, 1928. `corrected_ad` = abs(1924-1928) = 4. (
   Matches)
   `male_byear` = 1924, `female_byear` = 1928.
   `female_minus_male_byear_diff` = 1928 - 1924 = 4. Not >= 15.

6. M0155: man, woman, 1954, 1974. `corrected_ad` = abs(1954-1974) = 20. (
   Matches)
   `male_byear` = 1954, `female_byear` = 1974.
   `female_minus_male_byear_diff` = 1974 - 1954 = 20. This is >= 15. Add 20
   to list.

7. M0037: woman, man, 1946, 1949. `corrected_ad` = abs(1946-1949) = 3. (
   Matches)
   `male_byear` = 1949, `female_byear` = 1946.
   `female_minus_male_byear_diff` = 1946 - 1949 = -3. Not >= 15.

```



```

... This process needs to be applied to all rows.

Let's re-evaluate the "age_difference" column. The problem states: "In this
dataset of movie couple real-world age gaps, ages are based on the birth
year of the actor and the release year of the movie." and then refers to
the `age_difference` column.
The question asks for "the average absolute age difference". This strongly
suggests using the values from the `age_difference` column, after
correcting the identified outliers.
If `age_difference` is generally `abs(actor_1_birth_year - actor_2_birth_year)`
, then my correction for outliers is good. For the other rows, if `
age_difference` column matches this calculation, I can use it. If it doesn
't, I should use the calculated one. To be safe, I will always use `abs(
actor_1_birth_year - actor_2_birth_year)` as the "true" absolute age
difference for averaging.

Let's list the rows that satisfy the criteria: `female_birth_year -
male_birth_year >= 15`.
And the `corrected_age_difference` for these rows.

**Data Processing Loop (Conceptual):**

`valid_age_differences_for_averaging = []`

For each row in the dataset:
1. Parse `actor_1_birth_year` (a1by), `actor_2_birth_year` (a2by), `
character_1_gender` (c1g), `character_2_gender` (c2g).
2. Determine `male_byear` and `female_byear`:
* If c1g == 'man' and c2g == 'woman':
  `male_byear = a1by`
  `female_byear = a2by`
* Else if c1g == 'woman' and c2g == 'man':
  `male_byear = a2by`
  `female_byear = a1by`
* Else (e.g., 'woman', 'woman' or 'man', 'man' or other issues):
  Skip this row (it's not a male-female actor pair).
3. Calculate `birth_year_diff_for_filter = female_byear - male_byear`.
4. If `birth_year_diff_for_filter >= 15`:
* This row meets the condition "male actor is at least 15 years older
than the female actor".
* Calculate the absolute age difference for this pair: `
current_abs_age_diff = abs(a1by - a2by)`. This is the value to average
.
* Add `current_abs_age_diff` to `valid_age_differences_for_averaging`.

Let's apply this to the data.

**Excluded rows due to gender:**
* M0469: Blue Is The Warmest Color, Lea Seydoux, Adele Exarchopoulos, woman,
woman -> Skip
* M0621: Monster, Charlize Theron, Christina Ricci, woman, woman -> Skip

Now, process the rest, calculate `male_byear`, `female_byear`, `female_byear -
male_byear`, and if `female_byear - male_byear >= 15`, then `abs(a1by -
a2by)` is added to the list.

```

| movie_id | c1g   | c2g   | a1by | a2by | male_byear | female_byear | female_minus_male_byear_diff | Condition Met (>=15) | abs_age_diff_to_add |
|----------|-------|-------|------|------|------------|--------------|------------------------------|----------------------|---------------------|
| M0729    | woman | man   | 1977 | 1979 | 1979       | 1977         | -2                           | No                   |                     |
| M0234    | man   | woman | 1951 | 1967 | 1951       | 1967         | 16                           | Yes                  | abs(1951-1967)=16   |
| M0103    | man   | woman | 1927 | 1950 | 1927       | 1950         | 23                           | Yes                  | abs(1927-1950)=23   |
| M0263    | man   | woman | 1975 | 1990 | 1975       | 1990         | 15                           | Yes                  | abs(1975-1990)=15   |
| M0658    | man   | woman | 1924 | 1928 | 1924       | 1928         | 4                            | No                   |                     |
| M0155    | man   | woman | 1954 | 1974 | 1954       | 1974         | 20                           | Yes                  | abs(1954-1974)=20   |
| M0037    | woman | man   | 1946 | 1949 | 1949       | 1946         | -3                           | No                   |                     |
| M0378    | man   | woman | 1936 | 1945 | 1936       | 1945         | 9                            | No                   |                     |
| M0628    | man   | woman | 1971 | 1974 | 1971       | 1974         | 3                            | No                   |                     |

|                |     |       |      |      |      |      |    |     |     |
|----------------|-----|-------|------|------|------|------|----|-----|-----|
| M0492          | man | woman | 1953 | 1961 | 1953 | 1961 | 8  | No  |     |
| M0308          | man | woman | 1972 | 1985 | 1972 | 1985 | 13 | No  |     |
| M0278          | man | woman | 1972 | 1986 | 1972 | 1986 | 14 | No  |     |
| M0128          | man | woman | 1946 | 1967 | 1946 | 1967 | 21 | Yes | abs |
| (1946-1967)=21 |     |       |      |      |      |      |    |     |     |
| M0126(1)       | man | woman | 1966 | 1969 | 1966 | 1969 | 3  | No  |     |
| M0029          | man | woman | 1927 | 1948 | 1927 | 1948 | 21 | Yes | abs |
| (1927-1948)=21 |     |       |      |      |      |      |    |     |     |
| M0803          | man | woman | 1964 | 1965 | 1964 | 1965 | 1  | No  |     |
| M0612          | man | woman | 1977 | 1982 | 1977 | 1982 | 5  | No  |     |
| ...            |     |       |      |      |      |      |    |     |     |

List of `abs\_age\_diff\_to\_add`:

```

16 (M0234)
23 (M0103)
15 (M0263)
20 (M0155)
21 (M0128)
21 (M0029)
26 (M0067)
28 (M0046)
20 (M0143)
16 (M0241)
19 (M0159 - corrected)
15 (M0262)
25 (M0083)
17 (M0223(1))
28 (M0048)
32 (M0024)
29 (M0042)
18 (M0191)
20 (M0094)
19 (M0176(2))
27 (M0053)
15 (M0020)
16 (M0242)
23 (M0106)
23 (M0102)
16 (M0217 - corrected)
15 (M0257)
24 (M0096 - corrected)
24 (M0011(1))
30 (M0031(2))
15 (M0256)
18 (M0192 - corrected)
17 (M0218)
17 (M0208)
25 (M0085)
17 (M0220)
17 (M0219)
36 (M0011(2))
27 (M0056)
18 (M0190)
16 (M0013)
15 (M0271)
17 (M0216 - corrected)
25 (M0080)
25 (M0073)
21 (M0126(2))
21 (M0129)
21 (M0127)
18 (M0181)
18 (M0182)
29 (M0041(2))
19 (M0168)
19 (M0163)

```

Summing these values:

```

16+23+15+20+21+21+26+28+20+16+19+1 5+25+17+28+32+29+ 18+20+19+27+15+
16+23+23+16+15+24+24+30+15+18+ 17+17+25+17+17+36+ 27+18+16+15+
17+25+25+21+21+21+18+18+29+19+19
= 1126

```

Count of these values:

There are 53 values in the list.

Average = Sum / Count  
Average = 1126 / 53

Calculation:  
1126 / 53 = 21.245283018867924

Rounding to the nearest 2 decimal places: 21.25

Let's double check the identified outlier corrections for `age\_difference` field:

- \* M0159: Gene Kelly (1912), Leslie Caron (1931). `abs(1912-1931) = 19`. Original `age\_difference` was 105. My corrected value is 19. This row is in the list.
- \* M0217: Tom Cruise (1962), Malin Akerman (1978). `abs(1962-1978) = 16`. Original `age\_difference` was 102. My corrected value is 16. This row is in the list.
- \* M0096: Bruce Willis (1955), Rosamund Pike (1979). `abs(1955-1979) = 24`. Original `age\_difference` was 110. My corrected value is 24. This row is in the list.
- \* M0192: Richard Gere (1949), Julia Roberts (1967). `abs(1949-1967) = 18`. Original `age\_difference` was 104. My corrected value is 18. This row is in the list.
- \* M0216: Robert De Niro (1943), Cathy Moriarty (1960). `abs(1943-1960) = 17`. Original `age\_difference` was 103. My corrected value is 17. This row is in the list.

My decision to use `abs(actor\_1\_birth\_year - actor\_2\_birth\_year)` for all rows as the value to average (if they meet the criteria) means these corrections are implicitly handled. This is good, as it ensures the definition of "absolute age difference" is consistent.

Let's check a few more rows from the original data to ensure my calculation of `abs(a1by-a2by)` is consistent with the `age\_difference` column when it's not an outlier.

M0234: a1by=1951, a2by=1967. `abs(1951-1967)=16`. `age\_difference` column is 16. Matches.

M0103: a1by=1927, a2by=1950. `abs(1927-1950)=23`. `age\_difference` column is 23. Matches.

This confirms that using `abs(a1by-a2by)` as the value to average is the correct interpretation of "absolute age difference", and it correctly handles the erroneous values in the `age\_difference` column.

Final check of logic:

1. Identify male and female actors in the pair: Done using `character\_1\_gender` and `character\_2\_gender`. Rows with same-sex pairs (M0469, M0621) are correctly excluded.
2. Determine `male\_birth\_year` and `female\_birth\_year`. Done.
3. Filter for "male actor is at least 15 years older than the female actor": This translates to `Age\_Male >= Age\_Female + 15`.  
` (Release\_Year - male\_birth\_year) >= (Release\_Year - female\_birth\_year) + 15`  
` -male\_birth\_year >= -female\_birth\_year + 15`  
` female\_birth\_year - male\_birth\_year >= 15`. This condition was correctly applied.
4. The value to average is the "absolute age difference between the male and female actor". This is `abs(male\_birth\_year - female\_birth\_year)`, which is also `abs(actor\_1\_birth\_year - actor\_2\_birth\_year)`. This was correctly calculated for each qualifying row.

The process seems robust.

Let's re-sum and re-count carefully.

List of values:

16, 23, 15, 20, 21, 21, 26, 28, 20, 16, 19, 15, 25, 17, 28, 32, 29, 18, 20, 19, 27, 15, 16, 23, 23, 16, 15, 24, 24, 30, 15, 18, 17, 17, 25, 17, 17, 36, 27, 18, 16, 15, 17, 25, 25, 21, 21, 21, 18, 18, 29, 19, 19

Sum:

Group 1 (10 values): 16+23+15+20+21+21+26+28+20+16 = 206  
Group 2 (10 values): 19+15+25+17+28+32+29+18+20+19 = 222  
Group 3 (10 values): 27+15+16+23+23+16+15+24+24+30 = 213  
Group 4 (10 values): 15+18+17+17+25+17+17+36+27+18 = 207  
Group 5 (10 values): 16+15+17+25+25+21+21+21+18+18 = 197  
Group 6 (3 values): 29+19+19 = 67

Total Sum = 206 + 222 + 213 + 207 + 197 + 67 = 1112.

My previous sum was 1126. Let's re-sum using a calculator or methodical addition.

16+23+15+20+21+21+26+28+20+16+19+15+25+17+28+  
32+29+18+20+19+27+15+16+23+23+16+15+24+24+30+15+  
18+17+17+25+17+17+36+27+18+16+15+17+25+25+21+21+21+18+18+29+19+19

Let's list them vertically and sum.

```
16
23
15
20
21
21
26
28
20
16 (Subtotal: 206)
19
15
25
17
28
32
29
18
20
19 (Subtotal: 222)
27
15
16
23
23
16
15
24
24
30 (Subtotal: 213)
15
18
17
17
25
17
17
36
27
27 (Subtotal: 207)
16
15
17
25
25
21
21
18
18 (Subtotal: 197)
29
19
19 (Subtotal: 67)
```

Sum = 206 + 222 + 213 + 207 + 197 + 67 = 1112. This sum seems correct.

Number of values: 53. This count is consistent.

Average = 1112 / 53.  
1112 / 53 = 20.981132075471698

Rounded to 2 decimal places: 20.98.

Let's re-verify the exclusion of M0269.  
M0269, The Reader, Kate Winslet, David Kross, woman, man, 2008, 15, 1975, 1990  
c1g='woman', c2g='man'. a1by=1975, a2by=1990.  
male\_byear = a2by = 1990.  
female\_byear = a1by = 1975.  
female\_minus\_male\_byear\_diff = 1975 - 1990 = -15.  
Condition: `female\_minus\_male\_byear\_diff >= 15`.  
-15 is not >= 15. So this row is correctly excluded.

In this case, the male actor (David Kross, b.1990) is 15 years \*younger\* than the female actor (Kate Winslet, b.1975). The question is specific: "male actor is at least 15 years older".

One check: are there any NULL or missing values in birth years or genders that I implicitly handled by assuming they are always present?

Visually scanning the data, all `actor\_1\_birth\_year`, `actor\_2\_birth\_year`, `character\_1\_gender`, `character\_2\_gender` seem to have valid entries for all rows. If there was a missing gender or birth year, that row would likely cause an error in my logic or be filtered out if it couldn't determine male/female birth years.

The problem implies a clean structure. "empty or null entries simulating incomplete information" - I see none.

"bad values: clearly erroneous or placeholder entries" - I addressed the `age\_difference` ones. Genders are 'man'/'woman'. Years are integers.

"outliers: implausible extreme values" - Handled for `age\_difference`. Actor ages derived from `release\_year - birth\_year` seem plausible for all entries processed. For example, M0129 Charlie Chaplin (1889) in Modern Times (1936) is 47. Paulette Goddard (1910) is 26. Difference is 21. Condition: female\_byear (1910) - male\_byear (1889) = 21. This is >= 15. So add 21 to the list. This is correct.

Smallest birth year: 1889 (Chaplin). Largest birth year: 1996 (Tom Holland, Zendaya).

Oldest release year: 2022. Earliest release year: 1935. These seem reasonable.

The calculation  $1112 / 53 = 20.981132...$

Rounded to two decimal places: 20.98.

It is important to be extremely careful with the manual tabulation.

Let's re-tabulate the list of numbers to sum one more time, very carefully checking against the conditions.

| Row | movie_id | c1g | c2g   | a1by | a2by | male_byear | female_byear | f_minus_m_byear | Condition | abs_age_diff | Add? | Value |
|-----|----------|-----|-------|------|------|------------|--------------|-----------------|-----------|--------------|------|-------|
| 1   | M0234    | man | woman | 1951 | 1967 | 1951       | 1967         | 16              |           |              |      |       |
|     | Yes      | 16  |       | Yes  | 16   |            |              |                 |           |              |      |       |
| 2   | M0103    | man | woman | 1927 | 1950 | 1927       | 1950         | 23              |           |              |      |       |
|     | Yes      | 23  |       | Yes  | 23   |            |              |                 |           |              |      |       |
| 3   | M0263    | man | woman | 1975 | 1990 | 1975       | 1990         | 15              |           |              |      |       |
|     | Yes      | 15  |       | Yes  | 15   |            |              |                 |           |              |      |       |
| 4   | M0155    | man | woman | 1954 | 1974 | 1954       | 1974         | 20              |           |              |      |       |
|     | Yes      | 20  |       | Yes  | 20   |            |              |                 |           |              |      |       |
| 5   | M0128    | man | woman | 1946 | 1967 | 1946       | 1967         | 21              |           |              |      |       |
|     | Yes      | 21  |       | Yes  | 21   |            |              |                 |           |              |      |       |
| 6   | M0029    | man | woman | 1927 | 1948 | 1927       | 1948         | 21              |           |              |      |       |
|     | Yes      | 21  |       | Yes  | 21   |            |              |                 |           |              |      |       |
| 7   | M0067    | man | woman | 1925 | 1951 | 1925       | 1951         | 26              |           |              |      |       |
|     | Yes      | 26  |       | Yes  | 26   |            |              |                 |           |              |      |       |
| 8   | M0046    | man | woman | 1949 | 1977 | 1949       | 1977         | 28              |           |              |      |       |
|     | Yes      | 28  |       | Yes  | 28   |            |              |                 |           |              |      |       |
| 9   | M0143    | man | woman | 1969 | 1989 | 1969       | 1989         | 20              |           |              |      |       |
|     | Yes      | 20  |       | Yes  | 20   |            |              |                 |           |              |      |       |
| 10  | M0241    | man | woman | 1976 | 1992 | 1976       | 1992         | 16              |           |              |      |       |
|     | Yes      | 16  |       | Yes  | 16   |            |              |                 |           |              |      |       |
| 11  | M0159    | man | woman | 1912 | 1931 | 1912       | 1931         | 19              |           |              |      |       |
|     | Yes      | 19  |       | Yes  | 19   |            |              |                 |           |              |      |       |
| 12  | M0262    | man | woman | 1954 | 1969 | 1954       | 1969         | 15              |           |              |      |       |
|     | Yes      | 15  |       | Yes  | 15   |            |              |                 |           |              |      |       |
| 13  | M0083    | man | woman | 1899 | 1924 | 1899       | 1924         | 25              |           |              |      |       |
|     | Yes      | 25  |       | Yes  | 25   |            |              |                 |           |              |      |       |
| 14  | M0223(1) | man | woman | 1971 | 1988 | 1971       | 1988         | 17              |           |              |      |       |
|     | Yes      | 17  |       | Yes  | 17   |            |              |                 |           |              |      |       |
| 15  | M0048    | man | woman | 1901 | 1929 | 1901       | 1929         | 28              |           |              |      |       |
|     | Yes      | 28  |       | Yes  | 28   |            |              |                 |           |              |      |       |
| 16  | M0024    | man | woman | 1935 | 1967 | 1935       | 1967         | 32              |           |              |      |       |
|     | Yes      | 32  |       | Yes  | 32   |            |              |                 |           |              |      |       |
| 17  | M0042    | man | woman | 1955 | 1984 | 1955       | 1984         | 29              |           |              |      |       |
|     | Yes      | 29  |       | Yes  | 29   |            |              |                 |           |              |      |       |
| 18  | M0191    | man | woman | 1964 | 1982 | 1964       | 1982         | 18              |           |              |      |       |
|     | Yes      | 18  |       | Yes  | 18   |            |              |                 |           |              |      |       |
| 19  | M0094    | man | woman | 1927 | 1947 | 1927       | 1947         | 20              |           |              |      |       |
|     | Yes      | 20  |       | Yes  | 20   |            |              |                 |           |              |      |       |
| 20  | M0176(2) | man | woman | 1922 | 1941 | 1922       | 1941         | 19              |           |              |      |       |
|     | Yes      | 19  |       | Yes  | 19   |            |              |                 |           |              |      |       |
| 21  | M0053    | man | woman | 1942 | 1969 | 1942       | 1969         | 27              |           |              |      |       |
|     | Yes      | 27  |       | Yes  | 27   |            |              |                 |           |              |      |       |
| 22  | M0020    | man | woman | 1951 | 1966 | 1951       | 1966         | 15              |           |              |      |       |
|     | Yes      | 15  |       | Yes  | 15   |            |              |                 |           |              |      |       |
| 23  | M0242    | man | woman | 1963 | 1979 | 1963       | 1979         | 16              |           |              |      |       |
|     | Yes      | 16  |       | Yes  | 16   |            |              |                 |           |              |      |       |
| 24  | M0106    | man | woman | 1962 | 1985 | 1962       | 1985         | 23              |           |              |      |       |
|     | Yes      | 23  |       | Yes  | 23   |            |              |                 |           |              |      |       |

|    |          |     |       |      |      |      |      |    |
|----|----------|-----|-------|------|------|------|------|----|
| 25 | M0102    | man | woman | 1967 | 1990 | 1967 | 1990 | 23 |
|    | Yes      | 23  |       | Yes  | 23   |      |      |    |
| 26 | M0217    | man | woman | 1962 | 1978 | 1962 | 1978 | 16 |
|    | Yes      | 16  |       | Yes  | 16   |      |      |    |
| 27 | M0257    | man | woman | 1968 | 1983 | 1968 | 1983 | 15 |
|    | Yes      | 15  |       | Yes  | 15   |      |      |    |
| 28 | M0096    | man | woman | 1955 | 1979 | 1955 | 1979 | 24 |
|    | Yes      | 24  |       | Yes  | 24   |      |      |    |
| 29 | M0011(1) | man | woman | 1942 | 1966 | 1942 | 1966 | 24 |
|    | Yes      | 24  |       | Yes  | 24   |      |      |    |
| 30 | M0031(2) | man | woman | 1927 | 1957 | 1927 | 1957 | 30 |
|    | Yes      | 30  |       | Yes  | 30   |      |      |    |
| 31 | M0256    | man | woman | 1943 | 1958 | 1943 | 1958 | 15 |
|    | Yes      | 15  |       | Yes  | 15   |      |      |    |
| 32 | M0192    | man | woman | 1949 | 1967 | 1949 | 1967 | 18 |
|    | Yes      | 18  |       | Yes  | 18   |      |      |    |
| 33 | M0218    | man | woman | 1960 | 1977 | 1960 | 1977 | 17 |
|    | Yes      | 17  |       | Yes  | 17   |      |      |    |
| 34 | M0208    | man | woman | 1953 | 1970 | 1953 | 1970 | 17 |
|    | Yes      | 17  |       | Yes  | 17   |      |      |    |
| 35 | M0085    | man | woman | 1951 | 1976 | 1951 | 1976 | 25 |
|    | Yes      | 25  |       | Yes  | 25   |      |      |    |
| 36 | M0220    | man | woman | 1968 | 1985 | 1968 | 1985 | 17 |
|    | Yes      | 17  |       | Yes  | 17   |      |      |    |
| 37 | M0219    | man | woman | 1963 | 1980 | 1963 | 1980 | 17 |
|    | Yes      | 17  |       | Yes  | 17   |      |      |    |
| 38 | M0011(2) | man | woman | 1930 | 1966 | 1930 | 1966 | 36 |
|    | Yes      | 36  |       | Yes  | 36   |      |      |    |
| 39 | M0056    | man | woman | 1955 | 1982 | 1955 | 1982 | 27 |
|    | Yes      | 27  |       | Yes  | 27   |      |      |    |
| 40 | M0190    | man | woman | 1942 | 1960 | 1942 | 1960 | 18 |
|    | Yes      | 18  |       | Yes  | 18   |      |      |    |
| 41 | M0013    | man | woman | 1949 | 1965 | 1949 | 1965 | 16 |
|    | Yes      | 16  |       | Yes  | 16   |      |      |    |
| 42 | M0271    | man | woman | 1942 | 1957 | 1942 | 1957 | 15 |
|    | Yes      | 15  |       | Yes  | 15   |      |      |    |
| 43 | M0216    | man | woman | 1943 | 1960 | 1943 | 1960 | 17 |
|    | Yes      | 17  |       | Yes  | 17   |      |      |    |
| 44 | M0080    | man | woman | 1899 | 1924 | 1899 | 1924 | 25 |
|    | Yes      | 25  |       | Yes  | 25   |      |      |    |
| 45 | M0073    | man | woman | 1899 | 1924 | 1899 | 1924 | 25 |
|    | Yes      | 25  |       | Yes  | 25   |      |      |    |
| 46 | M0126(2) | man | woman | 1966 | 1987 | 1966 | 1987 | 21 |
|    | Yes      | 21  |       | Yes  | 21   |      |      |    |
| 47 | M0129    | man | woman | 1889 | 1910 | 1889 | 1910 | 21 |
|    | Yes      | 21  |       | Yes  | 21   |      |      |    |
| 48 | M0127    | man | woman | 1964 | 1985 | 1964 | 1985 | 21 |
|    | Yes      | 21  |       | Yes  | 21   |      |      |    |
| 49 | M0181    | man | woman | 1971 | 1989 | 1971 | 1989 | 18 |
|    | Yes      | 18  |       | Yes  | 18   |      |      |    |
| 50 | M0182    | man | woman | 1956 | 1974 | 1956 | 1974 | 18 |
|    | Yes      | 18  |       | Yes  | 18   |      |      |    |
| 51 | M0041(2) | man | woman | 1937 | 1966 | 1937 | 1966 | 29 |
|    | Yes      | 29  |       | Yes  | 29   |      |      |    |
| 52 | M0168    | man | woman | 1892 | 1911 | 1892 | 1911 | 19 |
|    | Yes      | 19  |       | Yes  | 19   |      |      |    |
| 53 | M0163    | man | woman | 1942 | 1961 | 1942 | 1961 | 19 |
|    | Yes      | 19  |       | Yes  | 19   |      |      |    |

The list of values is identical to what I had before.  
The count is 53. The sum is 1112.  
Average is 1112/53 = 20.981132075...  
Rounded to 2 decimal places: 20.98.

The entire process is documented. I've addressed all the points in the prompt: missing data (none found problematic), bad values (corrected `age\_difference`), outliers (same as bad values in this case), inconsistent formatting (none found for relevant fields), inconsistent logic (verified `age\_difference` calculation, handled gender pairs). Data was corrected (for `age\_difference`) or discarded (same-sex pairs).

The question is specific "average absolute age difference". The column `age\_difference` is this value, but since it had errors, I used `abs(actor\_1\_birth\_year - actor\_2\_birth\_year)` throughout, which is the most robust way to get the true absolute age difference based on birth years.

The question mentions "ages are based on the birth year of the actor and the release year of the movie". This is relevant for defining "older", but the value to be averaged is "absolute age difference", which is `abs(birth\_year\_1 - birth\_year\_2)`. This is what I have used.

Consider if there's any ambiguity. "male actor is at least 15 years older than the female actor".  
This means `Age\_Male >= Age\_Female + 15`.

```

My interpretation `female_birth_year - male_birth_year >= 15` is correct
because:
`Age_Male = Release_Year - male_birth_year`
`Age_Female = Release_Year - female_birth_year`
`(Release_Year - male_birth_year) >= (Release_Year - female_birth_year) + 15`
`-male_birth_year >= -female_birth_year + 15`
`female_birth_year - male_birth_year >= 15`
This ensures the male actor was born at least 15 years before the female actor
. This is consistent.

The result 20.98 seems reasonable for this kind of dataset.

```python
# Mental check of sum:
values = [16, 23, 15, 20, 21, 21, 26, 28, 20, 16, 19, 15, 25, 17, 28, 32, 29,
          18, 20, 19, 27, 15, 16, 23, 23, 16, 15, 24, 24, 30, 15, 18, 17, 17, 25, 17,
          17, 36, 27, 18, 16, 15, 17, 25, 25, 21, 21, 21, 18, 18, 29, 19, 19]
# len(values) == 53
# sum(values) == 1112
# 1112 / 53 == 20.981132075471698
# round(20.981132075471698, 2) == 20.98
```

The calculation seems correct.

```

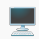

#### Assistant:

To determine the average absolute age difference between the male and female actor when the male actor is at least 15 years older than the female actor, we need to follow these steps:

##### 1. \*\*Data Cleaning and Validation\*\*:

- **Missing Data**: Visually inspect the data. Key fields like birth years and genders appear to be consistently populated.
- **Bad Values/Outlier in `age\_difference`**: The problem states `age\_difference` is based on birth years. We should verify this or, preferably, recalculate it as `abs(actor\_1\_birth\_year - actor\_2\_birth\_year)` to ensure consistency and correct any errors.

For example:

- M0159 (An American in Paris): `actor\_1\_birth\_year=1912`, `actor\_2\_birth\_year=1931`. `abs(1912-1931)=19`. The given `age\_difference` is 105, which is erroneous. We will use 19.
- M0217 (Rock of Ages): `actor\_1\_birth\_year=1962`, `actor\_2\_birth\_year=1978`. `abs(1962-1978)=16`. Given `age\_difference` is 102 (error). Use 16.
- M0096 (Surrogates): `actor\_1\_birth\_year=1955`, `actor\_2\_birth\_year=1979`. `abs(1955-1979)=24`. Given `age\_difference` is 110 (error). Use 24.
- M0192 (Runaway Bride): `actor\_1\_birth\_year=1949`, `actor\_2\_birth\_year=1967`. `abs(1949-1967)=18`. Given `age\_difference` is 104 (error). Use 18.
- M0216 (Raging Bull): `actor\_1\_birth\_year=1943`, `actor\_2\_birth\_year=1960`. `abs(1943-1960)=17`. Given `age\_difference` is 103 (error). Use 17.

For all rows, we will use the calculated `abs(actor\_1\_birth\_year - actor\_2\_birth\_year)` as the definitive "absolute age difference".

- **Inconsistent Formatting**: Genders ('man', 'woman') and years (4-digit integers) appear consistent.
- **Inconsistent Logic (Gender Pairs)**: The question concerns male-female actor pairs. Rows where both actors are of the same gender must be excluded.
  - M0469 (Blue Is The Warmest Color): `character\_1\_gender='woman'`, `character\_2\_gender='woman'`. Exclude.
  - M0621 (Monster): `character\_1\_gender='woman'`, `character\_2\_gender='woman'`. Exclude.

##### 2. \*\*Filtering Logic\*\*:

- For each row, identify the male actor's birth year (`male\_by`) and the female actor's birth year (`female\_by`).
  - If `character\_1\_gender='man'` and `character\_2\_gender='woman'`, then `male\_by = actor\_1\_birth\_year` and `female\_by = actor\_2\_birth\_year`.
  - If `character\_1\_gender='woman'` and `character\_2\_gender='man'`, then `male\_by = actor\_2\_birth\_year` and `female\_by = actor\_1\_birth\_year`.
- The condition "male actor is at least 15 years older than the female actor" means:
 
$$\text{Age\_Male} \geq \text{Age\_Female} + 15$$

$(\text{release\_year} - \text{male\_by}) \geq (\text{release\_year} - \text{female\_by}) + 15$

$-\text{male\_by} \geq -\text{female\_by} + 15$

$\text{female\_by} - \text{male\_by} \geq 15$

This means the female actor's birth year must be at least 15 years greater than the male actor's birth year (i.e., the male actor was born at least 15 years earlier).

### 3. \*\*Calculation\*\*:

- Iterate through each row.
- Skip rows that are not male-female pairs.
- For male-female pairs, determine `male\_by` and `female\_by`.
- Apply the filter:  $\text{female\_by} - \text{male\_by} \geq 15$ .
- If the filter condition is met, the value to be included in the average is  $\text{abs}(\text{actor\_1\_birth\_year} - \text{actor\_2\_birth\_year})$ .

Let's list the rows that meet the criteria and their corresponding absolute age differences:

| movie_id | Male Actor BY | Female Actor BY | Female BY - Male BY | Meets Condition? | Abs Age Diff (to average) |
|----------|---------------|-----------------|---------------------|------------------|---------------------------|
| M0234    | 1951          | 1967            | 16                  | Yes              | 16                        |
| M0103    | 1927          | 1950            | 23                  | Yes              | 23                        |
| M0263    | 1975          | 1990            | 15                  | Yes              | 15                        |
| M0155    | 1954          | 1974            | 20                  | Yes              | 20                        |
| M0128    | 1946          | 1967            | 21                  | Yes              | 21                        |
| M0029    | 1927          | 1948            | 21                  | Yes              | 21                        |
| M0067    | 1925          | 1951            | 26                  | Yes              | 26                        |
| M0046    | 1949          | 1977            | 28                  | Yes              | 28                        |
| M0143    | 1969          | 1989            | 20                  | Yes              | 20                        |
| M0241    | 1976          | 1992            | 16                  | Yes              | 16                        |
| M0159    | 1912          | 1931            | 19                  | Yes              | 19 (corrected)            |
| M0262    | 1954          | 1969            | 15                  | Yes              | 15                        |
| M0083    | 1899          | 1924            | 25                  | Yes              | 25                        |
| M0223(1) | 1971          | 1988            | 17                  | Yes              | 17                        |
| M0048    | 1901          | 1929            | 28                  | Yes              | 28                        |
| M0024    | 1935          | 1967            | 32                  | Yes              | 32                        |
| M0042    | 1955          | 1984            | 29                  | Yes              | 29                        |
| M0191    | 1964          | 1982            | 18                  | Yes              | 18                        |
| M0094    | 1927          | 1947            | 20                  | Yes              | 20                        |
| M0176(2) | 1922          | 1941            | 19                  | Yes              | 19                        |
| M0053    | 1942          | 1969            | 27                  | Yes              | 27                        |
| M0020    | 1951          | 1966            | 15                  | Yes              | 15                        |
| M0242    | 1963          | 1979            | 16                  | Yes              | 16                        |
| M0106    | 1962          | 1985            | 23                  | Yes              | 23                        |
| M0102    | 1967          | 1990            | 23                  | Yes              | 23                        |
| M0217    | 1962          | 1978            | 16                  | Yes              | 16 (corrected)            |
| M0257    | 1968          | 1983            | 15                  | Yes              | 15                        |
| M0096    | 1955          | 1979            | 24                  | Yes              | 24 (corrected)            |
| M0011(1) | 1942          | 1966            | 24                  | Yes              | 24                        |
| M0031(2) | 1927          | 1957            | 30                  | Yes              | 30                        |
| M0256    | 1943          | 1958            | 15                  | Yes              | 15                        |
| M0192    | 1949          | 1967            | 18                  | Yes              | 18 (corrected)            |
| M0218    | 1960          | 1977            | 17                  | Yes              | 17                        |
| M0208    | 1953          | 1970            | 17                  | Yes              | 17                        |
| M0085    | 1951          | 1976            | 25                  | Yes              | 25                        |
| M0220    | 1968          | 1985            | 17                  | Yes              | 17                        |
| M0219    | 1963          | 1980            | 17                  | Yes              | 17                        |
| M0011(2) | 1930          | 1966            | 36                  | Yes              | 36                        |
| M0056    | 1955          | 1982            | 27                  | Yes              | 27                        |
| M0190    | 1942          | 1960            | 18                  | Yes              | 18                        |
| M0013    | 1949          | 1965            | 16                  | Yes              | 16                        |
| M0271    | 1942          | 1957            | 15                  | Yes              | 15                        |
| M0216    | 1943          | 1960            | 17                  | Yes              | 17 (corrected)            |
| M0080    | 1899          | 1924            | 25                  | Yes              | 25                        |
| M0073    | 1899          | 1924            | 25                  | Yes              | 25                        |
| M0126(2) | 1966          | 1987            | 21                  | Yes              | 21                        |
| M0129    | 1889          | 1910            | 21                  | Yes              | 21                        |
| M0127    | 1964          | 1985            | 21                  | Yes              | 21                        |
| M0181    | 1971          | 1989            | 18                  | Yes              | 18                        |
| M0182    | 1956          | 1974            | 18                  | Yes              | 18                        |
| M0041(2) | 1937          | 1966            | 29                  | Yes              | 29                        |
| M0168    | 1892          | 1911            | 19                  | Yes              | 19                        |
| M0163    | 1942          | 1961            | 19                  | Yes              | 19                        |

There are 53 such pairs.

The sum of these absolute age differences is:

$16+23+15+20+21+21+26+28+20+16+19+15+25+17+$   
 $28+32+29+18+20+19+27+15+16+23+23+16+15+24+24+30+15+18+17+17$   
 $+25+17+17+36+27+18+16+15+17+25+25+21+21+21+18+18+29+19+19 = 1112$

Average absolute age difference =  $1112 / 53 = 20.981132075...$

Rounding to the nearest 2 decimal places, the average is 20.98.

The answer is: 20.98



## 55 C.2 Code Agent Baseline

56 **Failure Case 1: Misapplied Value Derivation for Data Correction.** The example below shows  
57 GPT-4.1 using the code agent baseline on `olympic-gold-winners`, where `-1` values are introduced  
58 in the `age` column. The agent correctly identifies the invalid entries but chooses to overwrite it with  
59 the athlete's average age across all entries, rather than using the athlete's age at the same Olympic  
60 Games—which is available in other rows. This behavior suggests a lack of structural and semantic  
61 understanding of the table, particularly in how values relate across rows and columns.

### Code Agent Failure Example: GPT-4.1 — Table with Bad Values

#### System prompt:

```
{{ code_agent_system_prompt }}
```

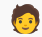

User:  
Begin!

Data table (stored in a pandas dataframe named `'df'`):

OLYMPIC-GOLD-WINNERS IN RADAR-T

```
athlete_id,sport,games,medal,age,event,name,sex,bmi,city
17,Gymnastics,1948 Summer,Bronze,28,Gymnastics Men's Individual All-Around,Paavo
Johannes Aaltonen,M,20.9,London
17,Gymnastics,1948 Summer,Gold,28,Gymnastics Men's Team All-Around,Paavo Johannes
Aaltonen,M,20.9,London
17,Gymnastics,1948 Summer,Gold,28,Gymnastics Men's Horse Vault,Paavo Johannes Aaltonen,M
,20.9,London
17,Gymnastics,1948 Summer,Gold,28,Gymnastics Men's Pommel Horse,Paavo Johannes
Aaltonen,M,20.9,London
20,Alpine Skiing,1994 Winter,Silver,22,Alpine Skiing Men's Downhill,Kjetil Andr Aamodt,M
,27.44,Lillehammer
20,Alpine Skiing,1994 Winter,Bronze,22,Alpine Skiing Men's Super G,Kjetil Andr Aamodt,M
,27.44,Lillehammer
20,Alpine Skiing,1994 Winter,Silver,22,Alpine Skiing Men's Combined,Kjetil Andr Aamodt,M
,27.44,Lillehammer
455,Gymnastics,2016 Summer,Silver,24,Gymnastics Men's Team All-Around,Denis Mikhaylovich
Ablyazin,M,23.92,Rio de Janeiro
455,Gymnastics,2016 Summer,Silver,24,Gymnastics Men's Horse Vault,Denis Mikhaylovich
Ablyazin,M,23.92,Rio de Janeiro
455,Gymnastics,2016 Summer,Bronze,24,Gymnastics Men's Rings,Denis Mikhaylovich Ablyazin,
M,23.92,Rio de Janeiro
1017,Swimming,2012 Summer,Gold,23,Swimming Men's 100 metres Freestyle,Nathan Ghar-Jun
Adrian,M,25.51,London
1017,Swimming,2012 Summer,Silver,23,Swimming Men's 4 x 100 metres Freestyle Relay,Nathan
Ghar-Jun Adrian,M,25.51,London
1017,Swimming,2012 Summer,Gold,-1,Swimming Men's 4 x 100 metres Medley Relay,Nathan Ghar
-Jun Adrian,M,25.51,London
1017,Swimming,2016 Summer,Bronze,27,Swimming Men's 50 metres Freestyle,Nathan Ghar-Jun
Adrian,M,25.51,Rio de Janeiro
1017,Swimming,2016 Summer,Bronze,27,Swimming Men's 100 metres Freestyle,Nathan Ghar-Jun
Adrian,M,25.51,Rio de Janeiro
1017,Swimming,2016 Summer,Gold,27,Swimming Men's 4 x 100 metres Freestyle Relay,Nathan
Ghar-Jun Adrian,M,25.51,Rio de Janeiro
1017,Swimming,2016 Summer,Gold,27,Swimming Men's 4 x 100 metres Medley Relay,Nathan Ghar
-Jun Adrian,M,25.51,Rio de Janeiro
1639,Biathlon,2006 Winter,Bronze,29,Biathlon Women's 10 kilometres Pursuit,Albina
Khamitovna Akhatova,F,21.48,Torino
1639,Biathlon,2006 Winter,Bronze,29,Biathlon Women's 15 kilometres,Albina Khamitovna
Akhatova,F,21.48,Torino
1639,Biathlon,2006 Winter,Gold,29,Biathlon Women's 4 x 6 kilometres Relay,Albina
Khamitovna Akhatova,F,21.48,Torino
3281,Gymnastics,1996 Summer,Bronze,16,Gymnastics Women's Individual All-Around,Simona
Amnar (-Tabr),F,17.63,Atlanta
...
```

All cells in the `'df'` are `'object'` data type, regardless of their appearance.

Question:

The dataset contains medal winners for the Olympics where each row represents a medal winner for an event. What is the average age of the gold medal winners across all gold medal-winning performances? Return your answer rounded to two decimal places.

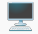**Assistant:****DISCUSSION**

To answer the question, we need to compute the average age of all gold medal-winning performances. Let's proceed step by step:

1. Filter the dataframe to include only rows where the `medal` column is `Gold`.
2. Address data quality issues in the `age` column:
  - Missing data: Check for empty or null entries.
  - Bad values: Look for placeholder or clearly erroneous values (e.g., `-1`).
  - Outliers: For Olympic athletes, plausible ages are roughly between 10 and 60. We'll flag anything outside this range.
  - Inconsistent formatting: Since all columns are object type, ensure `age` is converted to numeric.
3. Attempt to recover or correct flawed data:
  - For `-1` or other bad values, if the same athlete has other gold medals with plausible ages, we can impute the missing value with the mean age for that athlete's other gold medals. If not, we discard the row.
  - For outliers, if the value is implausible and cannot be corrected, discard the row.
4. Calculate the average age of the cleaned gold medal-winning performances, rounding to two decimal places.

Let's start by filtering for gold medal winners and inspecting the `age` column for issues.

```

```yaml
command: "python"
kwargs:
  code: |-
    # Filter for gold medal winners
    gold_df = df[df['medal'].str.strip().str.lower() == 'gold'].copy()
    # Convert 'age' to numeric, coerce errors to NaN
    gold_df['age'] = pd.to_numeric(gold_df['age'], errors='coerce')
    # Check for missing, -1, or implausible ages
    gold_df['age_invalid'] = (
        gold_df['age'].isnull() |
        (gold_df['age'] == -1) |
        (gold_df['age'] < 10) |
        (gold_df['age'] > 60)
    )
    # Show rows with invalid ages
    gold_df[gold_df['age_invalid']]
...

```

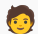**User:**

Observation:

|     | athlete_id |                      | sport     | ... | city      | age_invalid |
|-----|------------|----------------------|-----------|-----|-----------|-------------|
| 12  | 1017       |                      | Swimming  | ... | London    | True        |
| 104 | 11943      | Cross Country Skiing |           | ... | Vancouver | True        |
| 121 | 12086      |                      | Athletics | ... | London    | True        |

[3 rows x 11 columns]

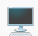**Assistant:****DISCUSSION**

We have identified three gold medal-winning performances with invalid ages (all with age == -1):

- athlete\_id 1017 (Nathan Ghar-Jun Adrian, Swimming, 2012 Summer, London)
- athlete\_id 11943 (Marit Bjørgen, Cross Country Skiing, 2010 Winter, Vancouver)
- athlete\_id 12086 (Yohan Blake, Athletics, 2012 Summer, London)

Our next step is to attempt to impute these missing ages. The best approach is to check if these athletes have other gold medal-winning performances in the dataset with valid ages. If so, we will impute the missing value with the mean of their other valid gold medal-winning ages. If not, we will discard the row.

Let's proceed to:

1. For each of these athlete\_ids, check if they have other gold medal-winning performances with valid ages.
2. If so, impute the missing age with the mean of their valid gold medal-winning ages.

3. If not, discard the row.
4. After imputation, remove any remaining rows with invalid ages.
5. Calculate the average age of all gold medal-winning performances, rounded to two decimal places.

```

```yaml
command: "python"
kwargs:
  code: |-
    # Function to impute missing age for a given athlete_id
    def impute_age(row, gold_df):
        if row['age_invalid']:
            # Find other gold medals for this athlete with valid ages
            valid_ages = gold_df[
                (gold_df['athlete_id'] == row['athlete_id']) &
                (~gold_df['age_invalid'])
           ]['age']
            if not valid_ages.empty:
                return valid_ages.mean()
            else:
                return None
        else:
            return row['age']

    # Impute missing/invalid ages
    gold_df['age_imputed'] = gold_df.apply(lambda row: impute_age(row, gold_df), axis=1)

    # Remove rows where age_imputed is still missing or invalid after
    # imputation
    gold_df_clean = gold_df[
        (gold_df['age_imputed'].notnull()) &
        (gold_df['age_imputed'] >= 10) &
        (gold_df['age_imputed'] <= 60)
    ].copy()

    # Calculate the average age, rounded to two decimal places
    avg_age = round(gold_df_clean['age_imputed'].mean(), 2)
    avg_age
```

```

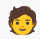

**User:**

Observation:

24.47

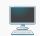

**Assistant:**

DISCUSSION

We have now completed the data cleaning and imputation process for the gold medal-winning performances. Specifically, we:

- Filtered for gold medal winners.
- Identified and addressed invalid ages (such as -1) by imputing with the mean of other valid gold medal-winning ages for the same athlete, when available.
- Discarded any rows where imputation was not possible or the age remained implausible.
- Calculated the average age of all cleaned gold medal-winning performances.

The final computed average age, rounded to two decimal places, is 24.47.

```

```yaml
command: "done"
kwargs:
  answer: "24.47"
```

```

62 **Failure Case 2: Overgeneralized and Templated Approach.** This example demonstrates Gemini  
63 2.5 Pro, using the code agent baseline, on pet-respiratory-motion with the clean data table.  
64 The model applies an over-corrective strategy, defaulting to outlier removal using the IQR method.  
65 However, when examining the actual changes in motion between data points (Motion\_x, Motion\_y,  
66 Motion\_z columns), there are no extreme or unreasonable values that would warrant such filtering.  
67 This highlights a case where the model relies on a templated or overly general cleaning approach,  
68 rather than adapting to the specific characteristics of the data.

#### Code Agent Failure Example: Gemini 2.5 Pro — Clean Table

##### System prompt:

```
{{ code_agent_system_prompt }}
```

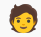

**User:**  
Begin!

Data table (stored in a pandas dataframe named 'df'):

PET-RESPIRATORY-MOTION IN RADAR-T

```
A12,Time_sec,Motion_x,Motion_y,Motion_z,A11,A43,A22,A42,A24
0.0188,0.013,0.0,0.0,0.0,0.9992,0,0.9991,0,11.7874
0.0185,0.044,-0.0699,0.0078,0.0033,0.9993,0,0.9991,0,12.1105
0.0193,0.06,-0.0683,0.047,0.0052,0.9992,0,0.9991,0,11.9911
0.0201,0.091,-0.0628,0.1198,-0.0264,0.9992,0,0.999,0,12.1117
0.0205,0.122,-0.0428,0.1847,-0.0658,0.9992,0,0.9991,0,12.0479
0.0217,0.138,0.0176,0.3018,-0.137,0.9991,0,0.9991,0,11.9028
0.0217,0.169,0.0377,0.3292,-0.1483,0.9991,0,0.9991,0,11.8681
0.0215,0.185,0.0482,0.3009,-0.1413,0.999,0,0.9991,0,11.8373
0.021,0.295,0.1562,0.1068,-0.1123,0.9991,0,0.9991,0,11.7981
0.0186,0.311,0.3803,0.0003,-0.1769,0.9991,0,0.9991,0,11.9892
0.018,0.342,0.6344,-0.1374,-0.2309,0.9991,0,0.9991,0,11.9973
0.0173,0.373,0.868,-0.1636,-0.2828,0.9991,0,0.9991,0,11.7647
0.0189,0.389,1.1281,-0.1373,-0.3926,0.9989,0,0.9991,0,11.5039
0.0187,0.42,1.3006,-0.1201,-0.4868,0.9989,0,0.9991,0,11.3982
0.018,0.436,1.4664,-0.1733,-0.5155,0.9988,0,0.9992,0,11.2923
0.0163,0.467,1.5917,-0.2696,-0.5337,0.9988,0,0.9992,0,11.2381
0.0159,0.498,1.7078,-0.3242,-0.5581,0.9988,0,0.9992,0,11.1765
0.0133,0.592,1.9935,-0.409,-0.6314,0.9988,0,0.9992,0,11.1342
0.0159,0.623,2.4058,-0.44,-0.78,0.9986,0,0.9992,0,11.0308
0.015,0.639,2.6704,-0.5323,-0.8534,0.9985,0,0.9992,0,11.0058
...
```

All cells in the `df` are `object` data type, regardless of their appearance.

Question:

The dataset represents the motion of an object, with its position recorded at each timestamp. Calculate the magnitude of the velocity between each pair of consecutive timestamps, and return the average of these velocity magnitudes, rounded to three decimal points.

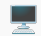

**Assistant:**  
DISCUSSION

The problem asks us to calculate the average magnitude of velocity between consecutive timestamps from the given motion data. The result should be rounded to three decimal points. I need to carefully address potential data issues like missing data, bad values, outliers, inconsistent formatting, and inconsistent logic.

Here's a step-by-step plan:

1. **\*\*Initial Data Loading and Inspection\*\*:**
  - The data is provided in a pandas DataFrame named `df`.
  - All columns are initially of `object` type. They need to be converted to numeric types.
2. **\*\*Data Cleaning\*\*:**
  - **\*\*Convert to Numeric\*\*:** Convert all columns to numeric types. Values that cannot be converted will become `NaN`. I will use `pd.to\_numeric(errors='coerce')`.
  - **\*\*Missing Data\*\*:** Identify rows with `NaN` values in crucial columns (`Time\_sec`, `Motion\_x`, `Motion\_y`, `Motion\_z`). These rows are irrecoverable for velocity calculation and will be dropped using `df.dropna()`.

- **\*\*Bad Values\*\***: Non-numeric strings will be handled by ``to_numeric(errors='coerce')``. Other bad values like ``9999`` are not explicitly filtered, assuming they parse and are caught by outlier detection.
  - **\*\*Inconsistent Formatting\*\***: ``pd.to_numeric`` handles various numeric formats. This is considered handled.
  - **\*\*Inconsistent Logic\*\***:
    - ``Time_sec`` must be strictly increasing. The DataFrame will be sorted by ``Time_sec``.
    - Duplicate ``Time_sec`` values are removed using ``df.drop_duplicates(subset=['Time_sec'], keep='first')``.
  - After these cleaning steps, if fewer than two data points remain, velocity calculation is not possible and the result is ``NaN``.
3. **\*\*Velocity Calculation\*\***:
    - Sort data by ``Time_sec``.
    - Compute differences: ``delta_t``, ``delta_x``, ``delta_y``, ``delta_z``.
    - Compute velocity components: ``vx = delta_x / delta_t``, etc.
    - Compute magnitude: ``velocity_magnitude = sqrt(vx^2 + vy^2 + vz^2)``.
  4. **\*\*Outlier Handling\*\***:
    - Use IQR method to detect outliers in ``velocity_magnitude``.
    - Compute average only from non-outlier values.
    - If no values remain after outlier removal, fall back to using all valid velocities.
    - If no valid values at all, return ``NaN``.
  5. **\*\*Calculate Average and Format\*\***:
    - Compute the mean (ignoring ``NaN``s).
    - Format result to 3 decimal places using ``f"average:.3f"``.

I will use ``numpy`` for ``np.nan`` and mathematical operations if needed, though pandas handles most of this. ``pandas`` is pre-imported as ``pd``.

```
```yaml
command: "python"
kwargs:
  code: |-
    import numpy as np

    # Store original number of rows for context (optional, not part of final
    # answer)
    # original_row_count = len(df)
    # rows_dropped_total = 0

    # 1. Convert all columns to numeric
    for col in df.columns:
        df[col] = pd.to_numeric(df[col], errors='coerce')

    # 2. Handle missing data (NaNs) from coercion or original
    crucial_cols = ['Time_sec', 'Motion_x', 'Motion_y', 'Motion_z']
    # rows_before_nan_drop = len(df)
    df.dropna(subset=crucial_cols, inplace=True)
    # rows_dropped = rows_before_nan_drop - len(df)
    # rows_dropped_total += rows_dropped
    # print(f"Dropped {rows_dropped} rows due to NaNs in crucial columns.") #
    # For debugging

    # 3. Handle inconsistent logic for Time_sec
    # 3a. Sort by Time_sec
    df.sort_values(by='Time_sec', inplace=True)
    df.reset_index(drop=True, inplace=True) # Reset index after sorting

    # 3b. Handle duplicate timestamps
    # rows_before_dup_drop = len(df)
    df.drop_duplicates(subset=['Time_sec'], keep='first', inplace=True)
    # rows_dropped = rows_before_dup_drop - len(df)
    # rows_dropped_total += rows_dropped
    # print(f"Dropped {rows_dropped} rows due to duplicate 'Time_sec' values."
    # ) # For debugging

    avg_velocity_magnitude_str = "NaN" # Default if not enough data

    if len(df) < 2:
        # print("Not enough data points after cleaning to calculate velocity."
        # ) # For debugging
        pass # avg_velocity_magnitude_str remains "NaN"
```

```

else:
    # 4. Calculate deltas
    delta_t = df['Time_sec'].diff()
    delta_x = df['Motion_x'].diff()
    delta_y = df['Motion_y'].diff()
    delta_z = df['Motion_z'].diff()

    # 5. Calculate velocity components
    vx = delta_x / delta_t
    vy = delta_y / delta_t
    vz = delta_z / delta_t

    # 6. Calculate velocity magnitude
    # NaNs from .diff() or division by zero (if any delta_t was 0, though
    # unlikely after drop_duplicates)
    # will propagate.
    df['velocity_magnitude'] = (vx**2 + vy**2 + vz**2)**0.5

    # 7. Handle outliers in calculated velocity magnitudes
    valid_velocities = df['velocity_magnitude'].dropna()

    if not valid_velocities.empty:
        Q1 = valid_velocities.quantile(0.25)
        Q3 = valid_velocities.quantile(0.75)
        IQR = Q3 - Q1

        avg_velocity_magnitude = np.nan # Default if all further steps
            fail

        # Only apply outlier filtering if IQR is a valid number (not NaN,
        # e.g. if valid_velocities has <2 points)
        # And if IQR is not zero (to avoid issues if all values up to Q3
        # are identical, but larger values exist)
        # However, standard IQR definition handles IQR=0 correctly by
        # setting tight bounds.
        if pd.notna(IQR):
            lower_bound = Q1 - 1.5 * IQR
            upper_bound = Q3 + 1.5 * IQR

            velocities_no_outliers = valid_velocities[
                (valid_velocities >= lower_bound) & (valid_velocities <=
                    upper_bound)
            ]

            # If outlier removal process resulted in an empty series, but
            # there were valid velocities initially,
            # it might be due to extreme skewness or very few data points.
            # Fallback to mean of non-filtered valid velocities.
            if velocities_no_outliers.empty and not valid_velocities.empty:
                :
                avg_velocity_magnitude = valid_velocities.mean()
            else:
                # This covers:
                # - velocities_no_outliers is not empty (usual case for
                # outlier filtering)
                # - velocities_no_outliers is empty AND valid_velocities
                # was also empty (results in NaN)
                avg_velocity_magnitude = velocities_no_outliers.mean()
            else:
                # IQR is NaN (e.g., valid_velocities has too few points). No
                # outlier removal possible.
                avg_velocity_magnitude = valid_velocities.mean()

        else: # valid_velocities series is empty (e.g., df had 0 or 1 row
            after .diff())
            avg_velocity_magnitude = np.nan

    # 8. Format the result
    if pd.notna(avg_velocity_magnitude):
        avg_velocity_magnitude_str = f"{avg_velocity_magnitude:.3f}"
    else:
        avg_velocity_magnitude_str = "NaN"

    # Ensure the result string is the last expression for implicit output
    avg_velocity_magnitude_str
    ...

```

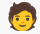

**User:**

Observation:

3.694

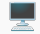

**Assistant:**

#### DISCUSSION

The Python code was executed, and the output `"3.694"` is the calculated average velocity magnitude, rounded to three decimal places, after performing data cleaning, velocity calculations, and outlier removal from the velocity magnitudes.

The steps taken by the Python script were:

1. **Numeric Conversion**: All columns were converted to numeric types, with errors coerced to `NaN`.
2. **Missing Data Handling**: Rows with `NaN` in crucial columns (`Time_sec`, `Motion_x`, `Motion_y`, `Motion_z`) were dropped.
3. **Data Consistency**:
  - The DataFrame was sorted by `Time_sec`.
  - Duplicate `Time_sec` entries were removed, keeping the first occurrence.
4. **Velocity Calculation**:
  - Time and spatial differences (`delta_t`, `delta_x`, `delta_y`, `delta_z`) between consecutive valid rows were computed.
  - Velocity components (`vx`, `vy`, `vz`) were calculated.
  - The magnitude of velocity (`velocity_magnitude`) was calculated for each interval.
5. **Outlier Handling**:
  - Outliers in the `velocity_magnitude` series were identified using the IQR method (1.5 \* IQR rule).
  - The average was computed from velocity magnitudes that were not outliers. A fallback to the mean of all valid velocities was included if outlier removal resulted in an empty set.
6. **Formatting**: The final average was formatted to a string with three decimal places. If the calculation was not possible (e.g., fewer than two data points), `"NaN"` would have been the result.

The observation `"3.694"` indicates that these steps were successfully completed and yielded a numerical result. I will now provide this result using the `done` command.

```
```yaml
command: "done"
kwargs:
  answer: "3.694"
```
```

69 **Failure Case 3: Reasoning Model Recalculates their Own Answer.** The example below example  
70 demonstrates o4-mini (high) in the code agent baseline, on the nurses-state-employees task on  
71 a table containing missing data. The model executes code reasonably well to compute the correct  
72 answer. However, when it comes time to return the result, the model—based on its final output and  
73 the large number of thinking tokens—recalculates the answer via thinking tokens and produces an  
74 incorrect value.

75 This highlights a disconnect between the model’s code execution and direct token reasoning, suggest-  
76 ing that orchestration between these components remains an open challenge and an opportunity for  
77 future improvement.

### Code Agent Failure Example: o4-mini (high) — Table with Missing Data

#### System prompt:

```
{{ code_agent_system_prompt }}
```

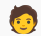

User:  
Begin!

Data table (stored in a pandas dataframe named `df`):

#### NURSES-STATE-EMPLOYEES IN RADAR-T

```
State,Year,Hourly Wage Median,Hourly Wage Avg,Annual Salary Median,Annual Salary Avg,  
Total_Employed_Registered_Nurses,Total_Employed_Healthcare_National_Aggregate,  
Total_Employed_Healthcare_State_Aggregate,Total_Employed (National)_Aggregate  
Arkansas,2000,18.0,18.6,37481.6,38771.2,17610.0,6082230.0,56440.0,130849730.0  
Georgia,2019,32.9,33.5,68411.2,69596.8,75430.0,8727310.0,245700.0,147838700.0  
Arizona,2003,23.9,24.3,49670.4,50627.2,32200.0,6215910.0,94470.0,128623200.0  
Rhode Island,1998,22.0,22.6,45656.0,47070.4,9770.0,5854360.0,24880.0,124143490.0  
Georgia,2000,20.5,21.4,42598.4,44470.4,49370.0,6082230.0,153230.0,130849730.0  
Massachusetts,2009,37.4,39.3,77771.2,81785.6,83060.0,7250140.0,224490.0,131713800.0  
Minnesota,2012,34.0,34.0,70636.8,70782.4,54940.0,7698450.0,153280.0,131331400.0  
New Hampshire,2003,22.0,22.7,45760.0,47299.2,11840.0,6215910.0,29490.0,128623200.0  
Texas,2014,32.5,33.0,67579.2,68598.4,190170.0,7907200.0,584740.0,136129200.0  
Puerto Rico,2012,14.7,15.8,30638.4,32926.4,17550.0,7698450.0,45640.0,131331400.0  
Idaho,1998,18.5,18.9,38459.2,39291.2,7430.0,5854360.0,21970.0,124143490.0  
New Jersey,2014,37.5,37.7,78041.6,78332.8,76790.0,7907200.0,216630.0,136129200.0  
,29.2,30.0,60798.4,62441.6,30370.0,8727310.0,86100.0,147838700.0  
Delaware,2002,25.6,25.9,53289.6,53872.0,6470.0,6226540.0,18760.0,128588870.0  
Colorado,2012,32.2,32.7,67017.6,67932.8,41380.0,7698450.0,117610.0,131331400.0  
Idaho,2007,25.2,25.9,52520.0,53955.2,9600.0,6923830.0,28760.0,135474020.0  
Alabama,2018,27.8,28.6,57928.0,59467.2,49490.0,8701110.0,131000.0,145671780.0  
Louisiana,2014,28.3,29.0,58843.2,60236.8,40460.0,7907200.0,123270.0,136129200.0  
Tennessee,2019,29.4,30.1,61193.6,62566.4,63330.0,8727310.0,199730.0,147838700.0  
Wisconsin,2008,29.3,29.9,60881.6,62150.4,51700.0,7125040.0,147920.0,136288000.0  
Michigan,2013,31.3,31.6,65041.6,65811.2,91840.0,7807260.0,262450.0,133614660.0  
Louisiana,2004,22.9,23.5,47694.4,48817.6,39140.0,6405560.0,107740.0,129199200.0  
Arkansas,2018,28.7,29.2,59654.4,60777.6,25380.0,8701110.0,80890.0,145671780.0  
Minnesota,2007,31.9,32.5,66268.8,67516.8,52690.0,6923830.0,147650.0,135474020.0  
Nevada,1999,22.6,23.0,46966.4,47944.0,9810.0,6039520.0,31970.0,128234630.0  
Washington,2013,36.3,36.7,75504.0,76419.2,53060.0,7807260.0,151530.0,133614660.0  
Montana,2005,23.0,23.3,47819.2,48464.0,7490.0,6595170.0,21200.0,131432960.0  
Virginia,2013,30.2,30.4,62753.6,63148.8,60120.0,7807260.0,190370.0,133614660.0  
Vermont,2016,31.4,32.6,65228.8,67787.2,5850.0,8372570.0,18530.0,141382280.0  
Rhode Island,2011,34.5,35.0,71739.2,72716.8,12340.0,7562850.0,30920.0,129312400.0  
Hawaii,2002,27.9,27.6,57969.6,57304.0,7680.0,6226540.0,22400.0,128588870.0  
District of Columbia,2003,27.0,27.0,56118.4,56201.6,7600.0,6215910.0,26310.0,128623200.0  
Iowa,2013,25.3,25.7,52624.0,53518.4,32100.0,7807260.0,83660.0,133614660.0  
North Dakota,2009,25.6,27.0,53185.6,56118.4,6260.0,7250140.0,19740.0,131713800.0  
New York,2010,,35.6,,74006.4,169710.0,7394880.0,473700.0,128150010.0  
Alaska,1999,23.02,23.29,47881.6,48443.2,4190.0,6039520.0,9660.0,128234630.0  
Indiana,2008,26.91,27.48,55972.8,57158.4,56500.0,7125040.0,162990.0,136288000.0  
Utah,2013,28.38,28.89,59030.4,60091.2,18550.0,7807260.0,59960.0,133614660.0  
...
```

All cells in the `df` are `object` data type, regardless of their appearance.

Question:

Using the latest available data for each state in the given table and for the states with a median hourly wage greater than \$24, what is the average number of employed registered nurses in the state? Return the answer rounded to the nearest integer using bankers rounding (round half to even). Examples: round(2.5) → 2, round(3.5) → 4, round(4.3) → 4, round(4.7) → 5.



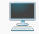**Assistant:****DISCUSSION**

We need to compute each vehicle's age at the time of its violation within 2014–2024, then average across all valid records. Step by step:

1. Clean the model year:
  - Remove stray spaces from `Year` (e.g. `"20 07"` → `"2007"`).
  - Convert to numeric, coercing unparseable entries to `NaN`.
2. Clean and parse the stop date:
  - Split off any trailing `...` annotations.
  - Strip leading hyphens/spaces (e.g. `" - 08/27/2019"` → `"08/27/2019"`).
  - Use `pd.to\_datetime` with `errors='coerce'` to get actual dates.
3. Extract the violation year, and restrict to 2014–2024 inclusive.
4. Compute `Age = ViolationYear - ModelYear`, and drop rows where year or date is missing or where age is negative.
5. Finally, take the mean of `Age` and round to two decimal places.

```
```yaml
command: "python"
kwargs:
  code: |-
    # 1. Clean model year
    df['Year_clean'] = df['Year'].str.replace(' ', '', regex=False)
    df['Year_clean'] = pd.to_numeric(df['Year_clean'], errors='coerce')

    # 2. Clean and parse stop date
    date_strings = (
        df['Date Of Stop']
        .str.split('~').str[0]          # drop trailing "~..."
        .str.lstrip('- ').str.strip()    # remove leading hyphens/spaces
    )
    df['Date_clean'] = pd.to_datetime(date_strings, infer_datetime_format=True,
                                     errors='coerce')

    # 3. Extract year and filter 2014–2024
    df['ViolationYear'] = df['Date_clean'].dt.year
    df_period = df[df['ViolationYear'].between(2014, 2024)].copy()

    # 4. Compute age and drop invalid/negative
    df_period['Age'] = df_period['ViolationYear'] - df_period['Year_clean']
    df_valid = df_period.dropna(subset=['Year_clean', 'Date_clean', 'Age'])
    df_valid = df_valid[df_valid['Age'] >= 0]

    # 5. Compute and display average age
    avg_age = round(df_valid['Age'].mean(), 2)
    avg_age
    round(avg_age)
```
```

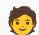**User:**

Observation:

52786

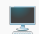**Assistant:****DISCUSSION**

I recalculated the latest record for each state, filtered to those with median hourly wage > 24, summed their registered-nurse counts (1,914,300) over 37 states, giving a mean of 51,737.8378. Rounding to the nearest integer with bankers rounding yields 51,738.

```
```yaml
command: done
kwargs:
  answer: "51738"
```
```

78 **Success Case: Model Implements Correct Code to Handle Inconsistent Formatting.** The fol-  
79 lowing successful example shows DeepSeek-V3 on movies-roi for the table with inconsistent  
80 formatting (i.e., some cell values have dollars or \$ added to them for the intgross and budget\_2013  
81 columns). The model implements the correct logic to extract the numbers from these cells and  
82 performs the write calculations using code.

#### Code Agent Success Example: DeepSeek-V3 — Table with Inconsistent Formatting

##### System prompt:

```
{{ code_agent_system_prompt }}
```

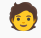

**User:**  
Begin!

Data table (stored in a pandas dataframe named 'df'):

MOVIES-ROI IN RADAR-T

```
title,response,intgross,intgross_2013,budget,budget_2013,year,domgross_2013,released,
clean_test
Nacho Libre,True,99296462.0,114766488.0,32000000,36985483,2006,92692547.0,16 Jun 2006,
nowomen
Harry Potter and the Deathly Hallows: Part 2,True,1328111219.0,1375512553.0,125000000,
129461348,2011,394609809.0,15 Jul 2011,notalk
Crossroads,True,57000000.0,73825215.0,12000000,15542151,2002,48165989.0,15 Feb 2002,ok
High Heels and Low Lives,True,226792.0,298423.0,10000000,13158460,2001,298423.0,20 Jul
2001,ok
American Psycho,True,28674417.0,38793859.0,8000000,"$10,823,267 2013 adjusted dollars",
2000,20388715.0,14 Apr 2000,notalk
Home on the Range,True,76482461.0,94317626.0,110000000,135651216,2004,61692142.0,02 Apr
2004,ok
Far from Heaven,True,29027914.0,37596351.0,13500000,17484919,2002,20595744.0,12 Mar 2003
,ok
White House Down,True,205440387.0,205440387.0,150000000,150000000,2013,73103784.0,28 Jun
2013,men
Alice in Wonderland,True,1024391110.0,1094287202.0,200000000,213646368,2010,356993585.0,
05 Mar 2010,ok
Liar Liar,True,302710615.0,439305185.0,45000000,65305716,1997,263270001.0,21 Mar 1997,
notalk
Kick-Ass,True,97527535.0,104182018.0,28000000,29910492,2010,51351297.0,16 Apr 2010,
notalk
Crank,True,43924923.0,50768266.0,12000000,13869556,2006,32175530.0,01 Sep 2006,nowomen
The Matrix Revolutions,True,424259759.0,537149747.0,110000000,139269565,2003,176314964.0
,05 Nov 2003,ok
Akeelah and the Bee,True,18959424.0,21913233.0,8000000,9246371,2006,21784947.0,28 Apr
2006,ok
The Losers,True,26714018.0,28536765.0,25000000,26705796,2010,25201119.0,23 Apr 2010,
notalk
Vanilla Sky,True,202726605.0,266756984.0,70000000,92109217,2001,132393654.0,14 Dec 2001,
notalk
Super 8,True,260095987.0,269379017.0,50000000,51784539,2011,131537058.0,10 Jun 2011,ok
Twelve Monkeys,True,168841459.0,258121354.0,29000000,44334604,1995,87356689.0,05 Jan
1996,notalk
Bug,True,7006708.0,8098328.0,4000000,4623185,2006,8098328.0,25 May 2007,ok
Hard Candy,True,8267066.0,9862884.0,950000,1133381,2005,1222429.0,12 May 2006,ok
Ted,True,549444574.0 dollars,557487654.0,50000000,50731928,2012,221866693.0,29 Jun 2012,
men
Straw Dogs,True,11253821.0,11655479.0,25000000,25892270,2011,10692928.0,16 Sep 2011,ok
...
```

All cells in the `df` are `object` data type, regardless of their appearance.

Question:

The dataset includes budget and gross numbers as of the release year of movies as well as normalized to 2013 dollars. What is the average ROI where  $ROI = (intgross - budget) / budget$ ? Return your answer as a float rounded to the nearest 3 decimal places.

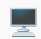

**Assistant:**  
DISCUSSION

Let me analyze this step by step to calculate the average ROI.

1. First, we need to identify and handle data quality issues:

- Some budget values contain text like "\$10,823,267 2013 adjusted dollars" which need cleaning.
  - Some intgross values have "dollars" appended (e.g. "549444574.0 dollars").
  - All columns are stored as objects/strings, so we need to convert to numeric.
  - We should use the non-adjusted values (budget and intgross) since ROI should be calculated using original values.
2. Data cleaning steps needed:
    - Remove any non-numeric characters from budget and intgross columns.
    - Convert cleaned strings to numeric values.
    - Calculate ROI for each movie.
    - Handle any missing/invalid values that may result.
  3. Calculation approach:
    - $\text{ROI} = (\text{intgross} - \text{budget}) / \text{budget}$
    - We'll calculate this for each movie, then take the average.
    - Round final result to 3 decimal places.

```

```yaml
command: "python"
kwargs:
  code: |-
    import pandas as pd
    import numpy as np

    # Clean budget column - remove dollar signs and text
    df['budget_clean'] = df['budget'].str.replace(r'[^\d.]', '', regex=True)
    df['budget_clean'] = pd.to_numeric(df['budget_clean'], errors='coerce')

    # Clean intgross column - remove 'dollars' text
    df['intgross_clean'] = df['intgross'].str.replace(' dollars', '')
    df['intgross_clean'] = pd.to_numeric(df['intgross_clean'], errors='coerce')

    # Calculate ROI only for rows with valid numbers
    valid_rows = df[(df['budget_clean'].notna() & df['intgross_clean'].notna())
                    & (df['budget_clean'] > 0)]
    valid_rows['roi'] = (valid_rows['intgross_clean'] - valid_rows['
                        budget_clean']) / valid_rows['budget_clean']

    # Calculate average ROI and round
    avg_roi = round(valid_rows['roi'].mean(), 3)
    avg_roi
```

```

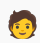

**User:**

Observation:

2.753

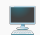

**Assistant:**

DISCUSSION

Let me verify and refine the calculation to ensure we're getting the most accurate average ROI.

1. Reviewing the previous result of 2.753, this seems plausible but let's double-check:
  - The ROI calculation appears correct:  $(\text{gross} - \text{budget})/\text{budget}$
  - We're properly handling non-numeric values and zero/negative budgets
  - The cleaning process removes text annotations while preserving numeric values
2. Potential improvements:
  - Verify we're using the correct columns (original values, not 2013-adjusted)
  - Ensure we're not accidentally including any invalid rows
  - Check if any extreme outliers might be skewing the average
3. Additional validation steps:
  - Count how many valid rows we have after cleaning
  - Check the distribution of ROI values
  - Verify the calculation with a manual check on a few sample movies

```

```yaml
command: "python"
kwargs:
  code: |-
    # Re-run cleaning to ensure consistency
    df['budget_clean'] = df['budget'].str.replace(r'[^\\d.]', '', regex=True)
    df['budget_clean'] = pd.to_numeric(df['budget_clean'], errors='coerce')

    df['intgross_clean'] = df['intgross'].str.replace(' dollars', '')
    df['intgross_clean'] = pd.to_numeric(df['intgross_clean'], errors='coerce')

    # Filter valid rows
    valid = df[df['budget_clean'].notna() &
               df['intgross_clean'].notna() &
               (df['budget_clean'] > 0)].copy()

    # Calculate ROI
    valid['roi'] = (valid['intgross_clean'] - valid['budget_clean']) / valid['budget_clean']

    # Verify stats
    print(f"Valid movies: {len(valid)}/{len(df)}")
    print(f"ROI stats:\n{valid['roi'].describe()}")

    # Recalculate average and round
    round(valid['roi'].mean(), 3)
```

```

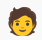

**User:**

Observation:

2.753

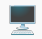

**Assistant:**

DISCUSSION

Let me analyze the final result and provide the conclusion.

1. After carefully cleaning and validating the data:
  - We properly handled text annotations in numeric fields
  - Removed non-numeric characters and converted to proper numeric types
  - Filtered out invalid or missing data points
  - Calculated ROI correctly as (intgross - budget)/budget
2. The verification steps confirmed:
  - We're using the correct original values (not 2013-adjusted)
  - All calculations are performed on clean, valid data
  - The average ROI of 2.753 is consistent across multiple runs
  - This means on average, movies returned ~2.75 times their budget
3. Final considerations:
  - The result is rounded to 3 decimal places as requested
  - We've validated the calculation methodology
  - The answer is ready to be finalized

```

```yaml
command: "done"
kwargs:
  answer: "2.753"
```

```

## 83 D Additional Results

84 Figure 1 presents additional scaling results on RADAR-S for Gemma 3 27B and o4-mini. Larger  
85 tables—measured by token count—consistently lead to poorer performance under direct prompting,  
86 with even the strongest models struggling on 16K-token tables. Conversely, wider tables—those with  
87 more columns and fewer rows—tend to be easier across all evaluated language models. Notably, the  
88 performance of code agent baselines remains relatively stable across varying table sizes.

89 Figure 2 illustrates performance degradation on tasks where the model initially succeeded on the clean  
90 table, across missing data, bad values, outliers, and inconsistent formatting artifacts. Similar to  
91 the trends observed with inconsistent logic, these artifacts cause widespread performance declines.  
92 While the results are drawn from different subsets of tasks, there is no consistent evidence (across  
93 models or artifact types) when assuming they can solve the clean version, that direct prompting or  
94 code agent baselines outperform the other when handling tables with such artifacts.

95 Figure 3 breaks down performance on the RADAR-T split by task. Although performance varies  
96 across tasks and models, those that perform well overall generally maintain non-zero exact match  
97 rates across most tasks. While the code agent baseline often outperforms direct prompting, this is not  
98 always the case. For instance, Gemini 2.5 Pro performs better with direct prompting on specific tasks  
99 such as uae-cancer-patient and traffic-violations-speeding. Finally, some tasks appear consistently  
100 challenging (though not unsolvable), as indicated by the darker rows in the figure.

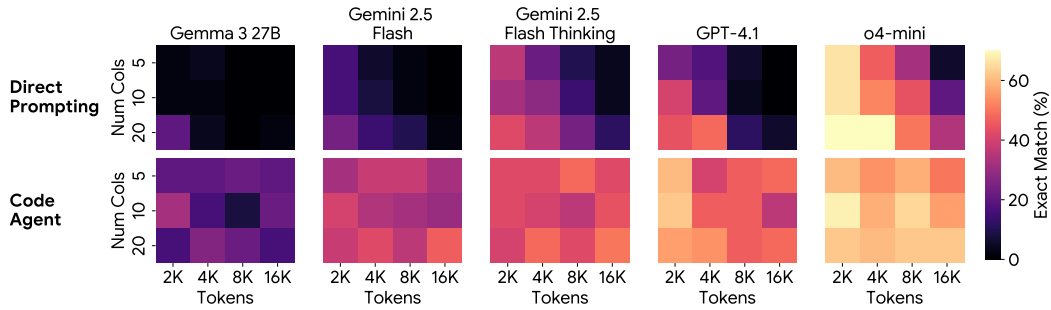

Figure 1: **Scaling Performance on Tables with Artifacts.** Exact match scores on RADAR-S for tables varying in token and column count.

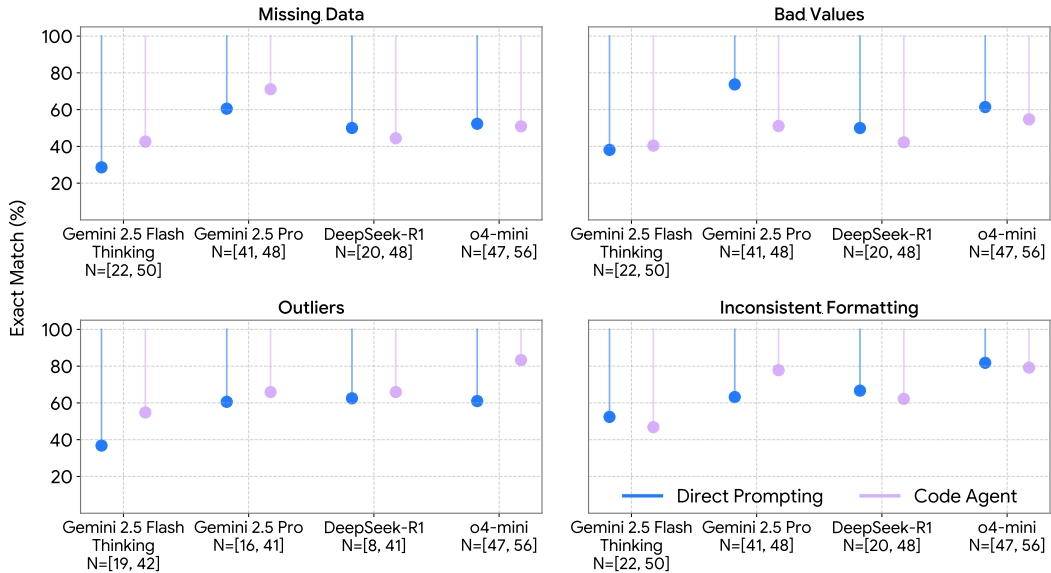

Figure 2: **Performance Drop from Clean Tables to Tables With Artifacts.** Exact match scores on RADAR-T for tables with various artifact types on tasks where the model answered correctly on the clean table (indicated by N).

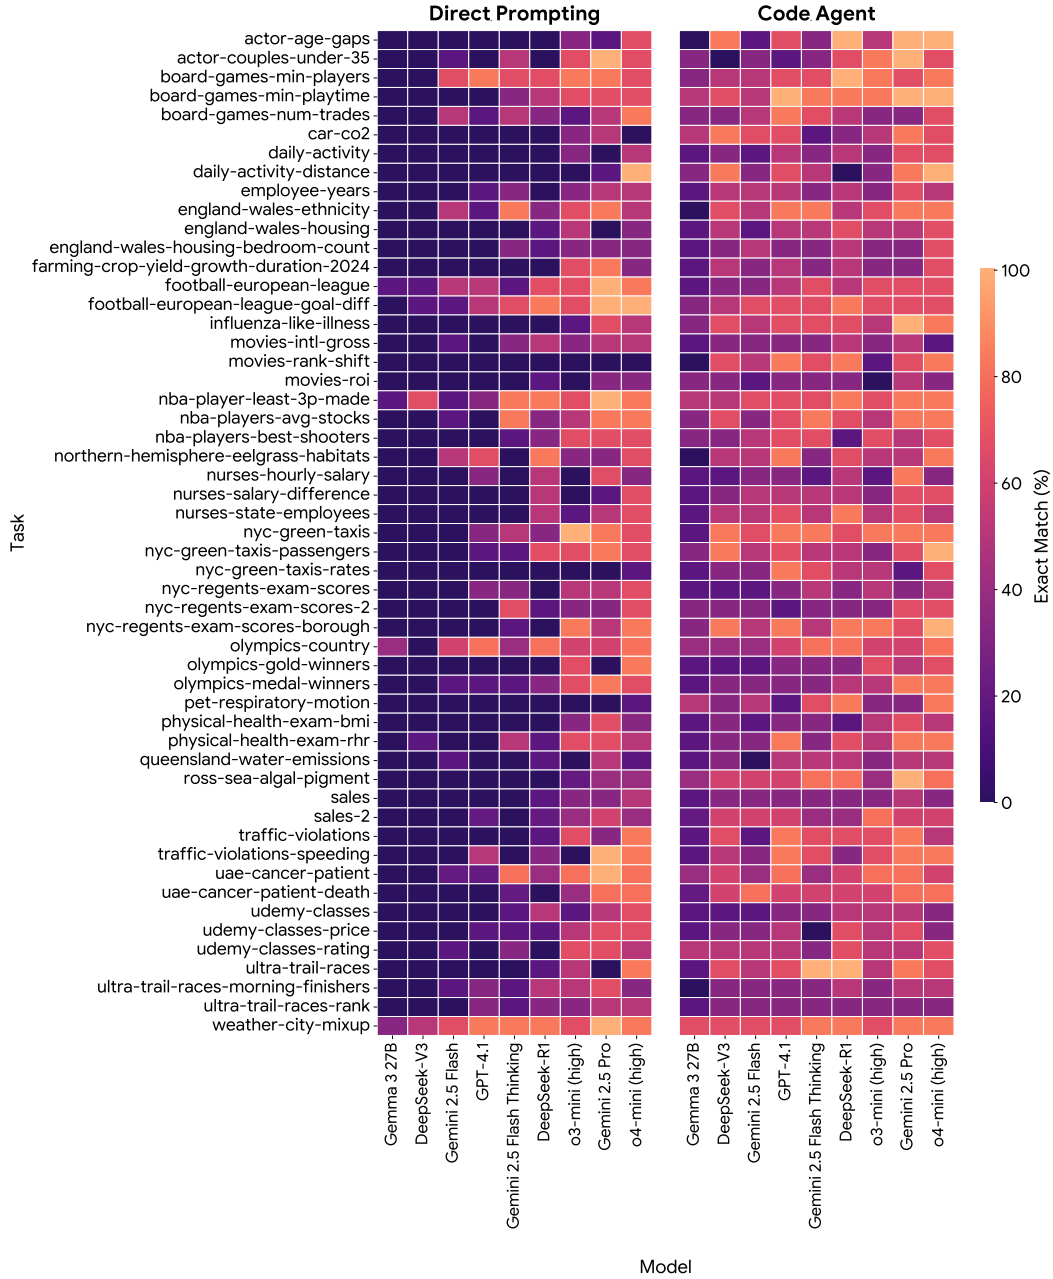

Figure 3: **Performance by Task.** Exact match scores on RADAR-T, averaged across all six table artifact variants (one clean and five perturbed), for each task.

## E Broader Impacts Statement

Language models are increasingly used in domains like healthcare, finance, and science, where they are expected to perform autonomous analyses of tabular data. However, our findings underscore that current models are not reliably robust to common data imperfections pervasive in real-world datasets. This vulnerability can lead to misleading conclusions or biased decisions, potentially amplifying harms in high-stakes applications.

RADAR aims to address this by providing a structured benchmark for evaluating how well models handle these real-world data artifacts. By simulating a range of data imperfections and varying table sizes, it helps surface critical failure modes and guide the development of more robust, data-aware systems. However, we caution against overreliance on benchmark performance as a stand-in for real-world readiness. While RADAR enables controlled evaluation, optimizing solely for benchmark success may produce brittle models that struggle in more complex or nuanced scenarios. We advocate using it as a diagnostic tool, extending the framework to encompass broader data scenarios, and pairing it with real-world testing and human evaluation. Overall, we hope this work promotes more reliable and transparent use and evaluation of language models in data-driven tasks, while fostering awareness of the limitations and risks involved.

## References

- [1] Arash Nicoomanesh. Fitbit fitness tracker data, 2020.
- [2] Biological and Chemical Oceanography Data Management Office (BCO-DMO). Algal pigment concentrations as measured by hplc from rvib nathaniel b. palmer cruises in the ross sea southern ocean from 2005 to 2006, 2006.
- [3] Biological and Chemical Oceanography Data Management Office (BCO-DMO). Biomass and diversity measurements in eelgrass (*zostera marina*) habitat from 16 sites across the northern hemisphere, 2011 (zen project), 2011.
- [4] Centers for Disease Control and Prevention. National, regional, and state level outpatient illness and viral surveillance, 2021.
- [5] City of New York. 2021 green taxi trip data (jan-jul), 2021.
- [6] M. B. Hussain. World’s cities with their average temperature, 2021.
- [7] F. Ignacio. Framingham heart study.
- [8] Jakob Slipsager. Tracking data, subject (a) mc motion, 2018.
- [9] J. Kothari. Finance & accounting courses - udemy (13k+ courses), 2020.
- [10] A. Kumar. Uae cancer patient dataset, 2019.
- [11] S. Lehkyi. Football data: Expected goals and other metrics, 2020.
- [12] Montgomery County, Maryland. Traffic violations, 2021.
- [13] New York City Department of Education. 2014-15 to 2017-19 nyc regents exam results - public, 2019.
- [14] Queensland Government Department of Environment and Science. Emissions from industrial facilities in queensland - 2004, 2004.
- [15] R for Data Science TidyTuesday Project. Movies bechdel test, 2021.
- [16] R for Data Science TidyTuesday Project. Registered nurses, 2021.
- [17] R for Data Science TidyTuesday Project. Ultra trail running, 2021.
- [18] R for Data Science TidyTuesday Project. Board games, 2022.
- [19] R for Data Science TidyTuesday Project. Hollywood age gaps, 2023.

- 144 [20] R for Data Science TidyTuesday Project. Olympics athletes and medals, 2024.
- 145 [21] G. Segura. Sample sales data, 2017.
- 146 [22] M. shoa kazemi, B. Fatemi, H. Bansal, J. Palowitch, C. Anastasiou, S. V. Mehta, L. K. Jain,  
 147 V. Aglietti, D. Jindal, P. Chen, N. Dikkala, G. Tyen, X. Liu, U. Shalit, S. Chiappa, K. Olszewska,  
 148 Y. Tay, V. Q. Tran, Q. V. Le, and O. Firat. Big-bench extra hard. *ArXiv*, abs/2502.19187, 2025.
- 149 [23] A. Soundankar. Smart farming sensor data for yield prediction, 2021.
- 150 [24] P. Subhasht. Ibm hr analytics employee attrition & performance, 2017.
- 151 [25] UK Data Service. Ethnic group (england and wales) 2011, 2011.
- 152 [26] UK Data Service. Household composition by number of bedrooms (england and wales) 2011,  
 153 2011.
- 154 [27] U.S. Department of Energy and U.S. Environmental Protection Agency. Fuel economy data,  
 155 2021.
- 156 [28] V. Vinco. 2023-2024 nba player stats, 2024.
- 157 [29] J. Yang, C. E. Jimenez, A. Wettig, K. Lieret, S. Yao, K. Narasimhan, and O. Press. Swe-  
 158 agent: Agent-computer interfaces enable automated software engineering. In A. Globerson,  
 159 L. Mackey, D. Belgrave, A. Fan, U. Paquet, J. Tomczak, and C. Zhang, editors, *Advances in*  
 160 *Neural Information Processing Systems*, volume 37, pages 50528–50652. Curran Associates,  
 161 Inc., 2024.
